# Supplementary material for: Within and Among Patch Variability in Patterns of Insect Herbivory Across a Fragmented Forest Landscape
Source: PLoS One. 2016 Mar 3;11(3):e0150843. doi: 10.1371/journal.pone.0150843 (PMC4777537; doi:10.1371/journal.pone.0150843)
Supplement: S3 Table — Raw data collected on herbivory used for analyses in this study. (XLSX) [file pone.0150843.s004.xlsx]

## Sheet: herbivoryESC.txt
S3 Table. Raw herbivory data. Raw data collected on herbivory used for analyses in this study.
YEAR	SUBJECT ID (Unique ID for each tree)	PATCH #	TREE LABEL (MC is canopy, UN is understory)	SIZE OF PATCH (S small, L large)	ISOLATION OF PATCH (C connected, I isolated)	SAMPLING ROUND (#1-5)	LOCATION IN PATCH (canopy, interior, edge)	HERBIVORY INDEX
2011	20111048MCT1	1048	MCT1	S	C	R1	CAN	4.333333333
2011	20111048MCT1	1048	MCT1	S	C	R2	CAN	6
2011	20111048MCT1	1048	MCT1	S	C	R3	CAN	6.5
2011	20111048MCT1	1048	MCT1	S	C	R4	CAN	2.333333333
2011	20111048MCT1	1048	MCT1	S	C	R5	CAN	2.666666667
2011	20111048MCT2	1048	MCT2	S	C	R1	CAN	10
2011	20111048MCT2	1048	MCT2	S	C	R2	CAN	11.58333333
2011	20111048MCT2	1048	MCT2	S	C	R3	CAN	15.75
2011	20111048MCT2	1048	MCT2	S	C	R4	CAN	4.333333333
2011	20111048MCT2	1048	MCT2	S	C	R5	CAN	4.916666667
2011	20111048UNT1	1048	UNT1	S	C	R1	INT	1
2011	20111048UNT1	1048	UNT1	S	C	R2	INT	2.5
2011	20111048UNT1	1048	UNT1	S	C	R3	INT	10.5
2011	20111048UNT1	1048	UNT1	S	C	R4	INT	25
2011	20111048UNT1	1048	UNT1	S	C	R5	INT	21.5
2011	20111048UNT2	1048	UNT2	S	C	R1	INT	2.25
2011	20111048UNT2	1048	UNT2	S	C	R2	INT	2.5
2011	20111048UNT2	1048	UNT2	S	C	R3	INT	6.25
2011	20111048UNT2	1048	UNT2	S	C	R4	INT	9.5
2011	20111048UNT2	1048	UNT2	S	C	R5	INT	2
2011	20111048UNT3	1048	UNT3	S	C	R1	INT	2.75
2011	20111048UNT3	1048	UNT3	S	C	R2	INT	1.75
2011	20111048UNT3	1048	UNT3	S	C	R3	INT	1.25
2011	20111048UNT3	1048	UNT3	S	C	R4	INT	7.5
2011	20111048UNT3	1048	UNT3	S	C	R5	INT	13.75
2011	20111048UNT4	1048	UNT4	S	C	R1	EDGE	1.75
2011	20111048UNT4	1048	UNT4	S	C	R2	EDGE	1.5
2011	20111048UNT4	1048	UNT4	S	C	R3	EDGE	0.5
2011	20111048UNT4	1048	UNT4	S	C	R4	EDGE	0.75
2011	20111048UNT4	1048	UNT4	S	C	R5	EDGE	3.25
2011	20111048UNT5	1048	UNT5	S	C	R1	EDGE	3.75
2011	20111048UNT5	1048	UNT5	S	C	R2	EDGE	6.75
2011	20111048UNT5	1048	UNT5	S	C	R3	EDGE	5.75
2011	20111048UNT5	1048	UNT5	S	C	R4	EDGE	6.75
2011	20111048UNT5	1048	UNT5	S	C	R5	EDGE	8.5
2011	20111048UNT6	1048	UNT6	S	C	R1	EDGE	4
2011	20111048UNT6	1048	UNT6	S	C	R2	EDGE	0.25
2011	20111048UNT6	1048	UNT6	S	C	R3	EDGE	2
2011	20111048UNT6	1048	UNT6	S	C	R4	EDGE	0.5
2011	20111048UNT6	1048	UNT6	S	C	R5	EDGE	1
2011	20111048UNTA	1048	UNTA	S	C	R1	INT	NA
2011	20111048UNTA	1048	UNTA	S	C	R2	INT	NA
2011	20111048UNTA	1048	UNTA	S	C	R3	INT	2.75
2011	20111048UNTA	1048	UNTA	S	C	R4	INT	1.25
2011	20111048UNTA	1048	UNTA	S	C	R5	INT	2.75
2011	20111048UNTB	1048	UNTB	S	C	R1	INT	NA
2011	20111048UNTB	1048	UNTB	S	C	R2	INT	NA
2011	20111048UNTB	1048	UNTB	S	C	R3	INT	9
2011	20111048UNTB	1048	UNTB	S	C	R4	INT	11
2011	20111048UNTB	1048	UNTB	S	C	R5	INT	12.5
2011	20111048UNTC	1048	UNTC	S	C	R1	INT	NA
2011	20111048UNTC	1048	UNTC	S	C	R2	INT	NA
2011	20111048UNTC	1048	UNTC	S	C	R3	INT	2.25
2011	20111048UNTC	1048	UNTC	S	C	R4	INT	2.5
2011	20111048UNTC	1048	UNTC	S	C	R5	INT	1.5
2011	20111048UNTD	1048	UNTD	S	C	R1	EDGE	NA
2011	20111048UNTD	1048	UNTD	S	C	R2	EDGE	NA
2011	20111048UNTD	1048	UNTD	S	C	R3	EDGE	2.777777778
2011	20111048UNTD	1048	UNTD	S	C	R4	EDGE	4.5
2011	20111048UNTD	1048	UNTD	S	C	R5	EDGE	1.75
2011	20111048UNTE	1048	UNTE	S	C	R1	EDGE	NA
2011	20111048UNTE	1048	UNTE	S	C	R2	EDGE	NA
2011	20111048UNTE	1048	UNTE	S	C	R3	EDGE	1.25
2011	20111048UNTE	1048	UNTE	S	C	R4	EDGE	5.75
2011	20111048UNTE	1048	UNTE	S	C	R5	EDGE	3.25
2011	20111048UNTF	1048	UNTF	S	C	R1	EDGE	NA
2011	20111048UNTF	1048	UNTF	S	C	R2	EDGE	NA
2011	20111048UNTF	1048	UNTF	S	C	R3	EDGE	4.5
2011	20111048UNTF	1048	UNTF	S	C	R4	EDGE	8.25
2011	20111048UNTF	1048	UNTF	S	C	R5	EDGE	12.25
2011	20111058MCT1	1058	MCT1	S	I	R1	CAN	5.166666667
2011	20111058MCT1	1058	MCT1	S	I	R2	CAN	4.5
2011	20111058MCT1	1058	MCT1	S	I	R3	CAN	4.2
2011	20111058MCT1	1058	MCT1	S	I	R4	CAN	2.75
2011	20111058MCT1	1058	MCT1	S	I	R5	CAN	2.583333333
2011	20111058MCT2	1058	MCT2	S	I	R1	CAN	3.5
2011	20111058MCT2	1058	MCT2	S	I	R2	CAN	0.333333333
2011	20111058MCT2	1058	MCT2	S	I	R3	CAN	1.833333333
2011	20111058MCT2	1058	MCT2	S	I	R4	CAN	0.75
2011	20111058MCT2	1058	MCT2	S	I	R5	CAN	3.25
2011	20111058UNT1	1058	UNT1	S	I	R1	INT	1.5
2011	20111058UNT1	1058	UNT1	S	I	R2	INT	2
2011	20111058UNT1	1058	UNT1	S	I	R3	INT	6.25
2011	20111058UNT1	1058	UNT1	S	I	R4	INT	4.25
2011	20111058UNT1	1058	UNT1	S	I	R5	INT	4.5
2011	20111058UNT2	1058	UNT2	S	I	R1	INT	3
2011	20111058UNT2	1058	UNT2	S	I	R2	INT	1.5
2011	20111058UNT2	1058	UNT2	S	I	R3	INT	6.5
2011	20111058UNT2	1058	UNT2	S	I	R4	INT	2.75
2011	20111058UNT2	1058	UNT2	S	I	R5	INT	4.25
2011	20111058UNT3	1058	UNT3	S	I	R1	INT	7
2011	20111058UNT3	1058	UNT3	S	I	R2	INT	1
2011	20111058UNT3	1058	UNT3	S	I	R3	INT	3.75
2011	20111058UNT3	1058	UNT3	S	I	R4	INT	9.5
2011	20111058UNT3	1058	UNT3	S	I	R5	INT	5
2011	20111058UNT4	1058	UNT4	S	I	R1	EDGE	20.25
2011	20111058UNT4	1058	UNT4	S	I	R2	EDGE	0.25
2011	20111058UNT4	1058	UNT4	S	I	R3	EDGE	0.75
2011	20111058UNT4	1058	UNT4	S	I	R4	EDGE	1.5
2011	20111058UNT4	1058	UNT4	S	I	R5	EDGE	0.5
2011	20111058UNT5	1058	UNT5	S	I	R1	EDGE	7.75
2011	20111058UNT5	1058	UNT5	S	I	R2	EDGE	6.25
2011	20111058UNT5	1058	UNT5	S	I	R3	EDGE	8.25
2011	20111058UNT5	1058	UNT5	S	I	R4	EDGE	2.25
2011	20111058UNT5	1058	UNT5	S	I	R5	EDGE	3.25
2011	20111058UNT6	1058	UNT6	S	I	R1	EDGE	3.75
2011	20111058UNT6	1058	UNT6	S	I	R2	EDGE	14
2011	20111058UNT6	1058	UNT6	S	I	R3	EDGE	13.25
2011	20111058UNT6	1058	UNT6	S	I	R4	EDGE	22.25
2011	20111058UNT6	1058	UNT6	S	I	R5	EDGE	13.25
2011	20111058UNTA	1058	UNTA	S	I	R1	INT	NA
2011	20111058UNTA	1058	UNTA	S	I	R2	INT	NA
2011	20111058UNTA	1058	UNTA	S	I	R3	INT	8.75
2011	20111058UNTA	1058	UNTA	S	I	R4	INT	4.75
2011	20111058UNTA	1058	UNTA	S	I	R5	INT	6.75
2011	20111058UNTB	1058	UNTB	S	I	R1	INT	NA
2011	20111058UNTB	1058	UNTB	S	I	R2	INT	NA
2011	20111058UNTB	1058	UNTB	S	I	R3	INT	0.5
2011	20111058UNTB	1058	UNTB	S	I	R4	INT	5.5
2011	20111058UNTB	1058	UNTB	S	I	R5	INT	5.5
2011	20111058UNTC	1058	UNTC	S	I	R1	INT	NA
2011	20111058UNTC	1058	UNTC	S	I	R2	INT	NA
2011	20111058UNTC	1058	UNTC	S	I	R3	INT	11.25
2011	20111058UNTC	1058	UNTC	S	I	R4	INT	6.25
2011	20111058UNTC	1058	UNTC	S	I	R5	INT	3.75
2011	20111058UNTD	1058	UNTD	S	I	R1	EDGE	NA
2011	20111058UNTD	1058	UNTD	S	I	R2	EDGE	NA
2011	20111058UNTD	1058	UNTD	S	I	R3	EDGE	27.25
2011	20111058UNTD	1058	UNTD	S	I	R4	EDGE	12.5
2011	20111058UNTD	1058	UNTD	S	I	R5	EDGE	28
2011	20111058UNTE	1058	UNTE	S	I	R1	EDGE	NA
2011	20111058UNTE	1058	UNTE	S	I	R2	EDGE	NA
2011	20111058UNTE	1058	UNTE	S	I	R3	EDGE	13.5
2011	20111058UNTE	1058	UNTE	S	I	R4	EDGE	37.25
2011	20111058UNTE	1058	UNTE	S	I	R5	EDGE	11.5
2011	20111058UNTF	1058	UNTF	S	I	R1	EDGE	NA
2011	20111058UNTF	1058	UNTF	S	I	R2	EDGE	NA
2011	20111058UNTF	1058	UNTF	S	I	R3	EDGE	5.25
2011	20111058UNTF	1058	UNTF	S	I	R4	EDGE	3
2011	20111058UNTF	1058	UNTF	S	I	R5	EDGE	1.5
2011	20111433MCT1	1433	MCT1	S	C	R1	CAN	3.166666667
2011	20111433MCT1	1433	MCT1	S	C	R2	CAN	4.083333333
2011	20111433MCT1	1433	MCT1	S	C	R3	CAN	6.120689655
2011	20111433MCT1	1433	MCT1	S	C	R4	CAN	3.6
2011	20111433MCT1	1433	MCT1	S	C	R4	CAN	10.91666667
2011	20111433MCT2	1433	MCT2	S	C	R1	CAN	2.75
2011	20111433MCT2	1433	MCT2	S	C	R2	CAN	4.166666667
2011	20111433MCT2	1433	MCT2	S	C	R3	CAN	8.833333333
2011	20111433MCT2	1433	MCT2	S	C	R4	CAN	3.833333333
2011	20111433MCT2	1433	MCT2	S	C	R4	CAN	5.583333333
2011	20111433UNT1	1433	UNT1	S	C	R1	INT	6.75
2011	20111433UNT1	1433	UNT1	S	C	R2	INT	2.5
2011	20111433UNT1	1433	UNT1	S	C	R3	INT	5.75
2011	20111433UNT1	1433	UNT1	S	C	R4	INT	15
2011	20111433UNT1	1433	UNT1	S	C	R4	INT	4.5
2011	20111433UNT2	1433	UNT2	S	C	R1	INT	2.5
2011	20111433UNT2	1433	UNT2	S	C	R2	INT	2.25
2011	20111433UNT2	1433	UNT2	S	C	R3	INT	5.25
2011	20111433UNT2	1433	UNT2	S	C	R4	INT	11
2011	20111433UNT2	1433	UNT2	S	C	R4	INT	4.25
2011	20111433UNT3	1433	UNT3	S	C	R1	INT	7
2011	20111433UNT3	1433	UNT3	S	C	R2	INT	4
2011	20111433UNT3	1433	UNT3	S	C	R3	INT	18.75
2011	20111433UNT3	1433	UNT3	S	C	R4	INT	7.25
2011	20111433UNT3	1433	UNT3	S	C	R4	INT	8.75
2011	20111433UNT4	1433	UNT4	S	C	R1	EDGE	4.75
2011	20111433UNT4	1433	UNT4	S	C	R2	EDGE	5.5
2011	20111433UNT4	1433	UNT4	S	C	R3	EDGE	2.25
2011	20111433UNT4	1433	UNT4	S	C	R4	EDGE	2.5
2011	20111433UNT4	1433	UNT4	S	C	R4	EDGE	1.5
2011	20111433UNT5	1433	UNT5	S	C	R1	EDGE	4.25
2011	20111433UNT5	1433	UNT5	S	C	R2	EDGE	0.75
2011	20111433UNT5	1433	UNT5	S	C	R3	EDGE	3.75
2011	20111433UNT5	1433	UNT5	S	C	R4	EDGE	13.75
2011	20111433UNT5	1433	UNT5	S	C	R4	EDGE	8
2011	20111433UNT6	1433	UNT6	S	C	R1	EDGE	3
2011	20111433UNT6	1433	UNT6	S	C	R2	EDGE	2.75
2011	20111433UNT6	1433	UNT6	S	C	R3	EDGE	7.25
2011	20111433UNT6	1433	UNT6	S	C	R4	EDGE	1.5
2011	20111433UNT6	1433	UNT6	S	C	R4	EDGE	1
2011	20111433UNTA	1433	UNTA	S	C	R1	INT	NA
2011	20111433UNTA	1433	UNTA	S	C	R2	INT	NA
2011	20111433UNTA	1433	UNTA	S	C	R3	INT	6.75
2011	20111433UNTA	1433	UNTA	S	C	R4	INT	20.75
2011	20111433UNTA	1433	UNTA	S	C	R4	INT	19.75
2011	20111433UNTB	1433	UNTB	S	C	R1	INT	NA
2011	20111433UNTB	1433	UNTB	S	C	R2	INT	NA
2011	20111433UNTB	1433	UNTB	S	C	R3	INT	12.5
2011	20111433UNTB	1433	UNTB	S	C	R4	INT	3.75
2011	20111433UNTB	1433	UNTB	S	C	R4	INT	14.25
2011	20111433UNTC	1433	UNTC	S	C	R1	INT	NA
2011	20111433UNTC	1433	UNTC	S	C	R2	INT	NA
2011	20111433UNTC	1433	UNTC	S	C	R3	INT	8.5
2011	20111433UNTC	1433	UNTC	S	C	R4	INT	23
2011	20111433UNTC	1433	UNTC	S	C	R4	INT	30
2011	20111433UNTD	1433	UNTD	S	C	R1	EDGE	NA
2011	20111433UNTD	1433	UNTD	S	C	R2	EDGE	NA
2011	20111433UNTD	1433	UNTD	S	C	R3	EDGE	12.75
2011	20111433UNTD	1433	UNTD	S	C	R4	EDGE	9.75
2011	20111433UNTD	1433	UNTD	S	C	R4	EDGE	9.75
2011	20111433UNTE	1433	UNTE	S	C	R1	EDGE	NA
2011	20111433UNTE	1433	UNTE	S	C	R2	EDGE	NA
2011	20111433UNTE	1433	UNTE	S	C	R3	EDGE	34.75
2011	20111433UNTE	1433	UNTE	S	C	R4	EDGE	24.75
2011	20111433UNTE	1433	UNTE	S	C	R4	EDGE	14.25
2011	20111433UNTF	1433	UNTF	S	C	R1	EDGE	NA
2011	20111433UNTF	1433	UNTF	S	C	R2	EDGE	NA
2011	20111433UNTF	1433	UNTF	S	C	R3	EDGE	12.25
2011	20111433UNTF	1433	UNTF	S	C	R4	EDGE	12
2011	20111433UNTF	1433	UNTF	S	C	R4	EDGE	15.75
2011	20111455MCT1	1455	MCT1	L	C	R1	CAN	4.083333333
2011	20111455MCT1	1455	MCT1	L	C	R2	CAN	6.916666667
2011	20111455MCT1	1455	MCT1	L	C	R3	CAN	8.4
2011	20111455MCT1	1455	MCT1	L	C	R4	CAN	6.083333333
2011	20111455MCT1	1455	MCT1	L	C	R5	CAN	9.333333333
2011	20111455MCT2	1455	MCT2	L	C	R1	CAN	5.333333333
2011	20111455MCT2	1455	MCT2	L	C	R2	CAN	3.666666667
2011	20111455MCT2	1455	MCT2	L	C	R3	CAN	3.583333333
2011	20111455MCT2	1455	MCT2	L	C	R4	CAN	4.25
2011	20111455MCT2	1455	MCT2	L	C	R5	CAN	6.75
2011	20111455UNT1	1455	UNT1	L	C	R1	INT	7.75
2011	20111455UNT1	1455	UNT1	L	C	R2	INT	1.666666667
2011	20111455UNT1	1455	UNT1	L	C	R3	INT	2.75
2011	20111455UNT1	1455	UNT1	L	C	R4	INT	3
2011	20111455UNT1	1455	UNT1	L	C	R5	INT	10.25
2011	20111455UNT2	1455	UNT2	L	C	R1	INT	5.25
2011	20111455UNT2	1455	UNT2	L	C	R2	INT	3.5
2011	20111455UNT2	1455	UNT2	L	C	R3	INT	15
2011	20111455UNT2	1455	UNT2	L	C	R4	INT	5.25
2011	20111455UNT2	1455	UNT2	L	C	R5	INT	15
2011	20111455UNT3	1455	UNT3	L	C	R1	INT	3.5
2011	20111455UNT3	1455	UNT3	L	C	R2	INT	2
2011	20111455UNT3	1455	UNT3	L	C	R3	INT	11.75
2011	20111455UNT3	1455	UNT3	L	C	R4	INT	17.75
2011	20111455UNT3	1455	UNT3	L	C	R5	INT	9.25
2011	20111455UNT4	1455	UNT4	L	C	R1	EDGE	0.5
2011	20111455UNT4	1455	UNT4	L	C	R2	EDGE	1.5
2011	20111455UNT4	1455	UNT4	L	C	R3	EDGE	0.5
2011	20111455UNT4	1455	UNT4	L	C	R4	EDGE	3.75
2011	20111455UNT4	1455	UNT4	L	C	R5	EDGE	2
2011	20111455UNT5	1455	UNT5	L	C	R1	EDGE	3.5
2011	20111455UNT5	1455	UNT5	L	C	R2	EDGE	0.25
2011	20111455UNT5	1455	UNT5	L	C	R3	EDGE	3.5
2011	20111455UNT5	1455	UNT5	L	C	R4	EDGE	11
2011	20111455UNT5	1455	UNT5	L	C	R5	EDGE	7.25
2011	20111455UNT6	1455	UNT6	L	C	R1	EDGE	13.25
2011	20111455UNT6	1455	UNT6	L	C	R2	EDGE	8.75
2011	20111455UNT6	1455	UNT6	L	C	R3	EDGE	13.5
2011	20111455UNT6	1455	UNT6	L	C	R4	EDGE	9.5
2011	20111455UNT6	1455	UNT6	L	C	R5	EDGE	6.75
2011	20111455UNTA	1455	UNTA	L	C	R1	INT	NA
2011	20111455UNTA	1455	UNTA	L	C	R2	INT	NA
2011	20111455UNTA	1455	UNTA	L	C	R3	INT	20.75
2011	20111455UNTA	1455	UNTA	L	C	R4	INT	38.25
2011	20111455UNTA	1455	UNTA	L	C	R5	INT	28.75
2011	20111455UNTB	1455	UNTB	L	C	R1	INT	NA
2011	20111455UNTB	1455	UNTB	L	C	R2	INT	NA
2011	20111455UNTB	1455	UNTB	L	C	R3	INT	13.5
2011	20111455UNTB	1455	UNTB	L	C	R4	INT	1.75
2011	20111455UNTB	1455	UNTB	L	C	R5	INT	3.75
2011	20111455UNTC	1455	UNTC	L	C	R1	INT	NA
2011	20111455UNTC	1455	UNTC	L	C	R2	INT	NA
2011	20111455UNTC	1455	UNTC	L	C	R3	INT	3.75
2011	20111455UNTC	1455	UNTC	L	C	R4	INT	6.5
2011	20111455UNTC	1455	UNTC	L	C	R5	INT	4.5
2011	20111455UNTD	1455	UNTD	L	C	R1	EDGE	NA
2011	20111455UNTD	1455	UNTD	L	C	R2	EDGE	NA
2011	20111455UNTD	1455	UNTD	L	C	R3	EDGE	1.5
2011	20111455UNTD	1455	UNTD	L	C	R4	EDGE	0.5
2011	20111455UNTD	1455	UNTD	L	C	R5	EDGE	1.5
2011	20111455UNTE	1455	UNTE	L	C	R1	EDGE	NA
2011	20111455UNTE	1455	UNTE	L	C	R2	EDGE	NA
2011	20111455UNTE	1455	UNTE	L	C	R3	EDGE	0.25
2011	20111455UNTE	1455	UNTE	L	C	R4	EDGE	0.5
2011	20111455UNTE	1455	UNTE	L	C	R5	EDGE	1.25
2011	20111455UNTF	1455	UNTF	L	C	R1	EDGE	NA
2011	20111455UNTF	1455	UNTF	L	C	R2	EDGE	NA
2011	20111455UNTF	1455	UNTF	L	C	R3	EDGE	11
2011	20111455UNTF	1455	UNTF	L	C	R4	EDGE	2.25
2011	20111455UNTF	1455	UNTF	L	C	R5	EDGE	1.5
2011	20111495MCT1	1495	MCT1	L	C	R1	CAN	5.25
2011	20111495MCT1	1495	MCT1	L	C	R2	CAN	3.25
2011	20111495MCT1	1495	MCT1	L	C	R3	CAN	3.25
2011	20111495MCT1	1495	MCT1	L	C	R4	CAN	3.833333333
2011	20111495MCT1	1495	MCT1	L	C	R5	CAN	8.416666667
2011	20111495MCT2	1495	MCT2	L	C	R1	CAN	1.083333333
2011	20111495MCT2	1495	MCT2	L	C	R2	CAN	1.333333333
2011	20111495MCT2	1495	MCT2	L	C	R3	CAN	1.083333333
2011	20111495MCT2	1495	MCT2	L	C	R4	CAN	6.583333333
2011	20111495MCT2	1495	MCT2	L	C	R5	CAN	1.333333333
2011	20111495UNT1	1495	UNT1	L	C	R1	INT	7.5
2011	20111495UNT1	1495	UNT1	L	C	R2	INT	5
2011	20111495UNT1	1495	UNT1	L	C	R3	INT	9.75
2011	20111495UNT1	1495	UNT1	L	C	R4	INT	5.25
2011	20111495UNT1	1495	UNT1	L	C	R5	INT	33.75
2011	20111495UNT2	1495	UNT2	L	C	R1	INT	5.25
2011	20111495UNT2	1495	UNT2	L	C	R2	INT	3.5
2011	20111495UNT2	1495	UNT2	L	C	R3	INT	6.5
2011	20111495UNT2	1495	UNT2	L	C	R4	INT	1.5
2011	20111495UNT2	1495	UNT2	L	C	R5	INT	2.75
2011	20111495UNT3	1495	UNT3	L	C	R1	INT	7.5
2011	20111495UNT3	1495	UNT3	L	C	R2	INT	4.5
2011	20111495UNT3	1495	UNT3	L	C	R3	INT	3.25
2011	20111495UNT3	1495	UNT3	L	C	R4	INT	4.444444444
2011	20111495UNT3	1495	UNT3	L	C	R5	INT	6
2011	20111495UNT4	1495	UNT4	L	C	R1	EDGE	8.75
2011	20111495UNT4	1495	UNT4	L	C	R2	EDGE	2.25
2011	20111495UNT4	1495	UNT4	L	C	R3	EDGE	8.75
2011	20111495UNT4	1495	UNT4	L	C	R4	EDGE	4.5
2011	20111495UNT4	1495	UNT4	L	C	R5	EDGE	7.5
2011	20111495UNT5	1495	UNT5	L	C	R1	EDGE	2.25
2011	20111495UNT5	1495	UNT5	L	C	R2	EDGE	1
2011	20111495UNT5	1495	UNT5	L	C	R3	EDGE	2.25
2011	20111495UNT5	1495	UNT5	L	C	R4	EDGE	0.25
2011	20111495UNT5	1495	UNT5	L	C	R5	EDGE	5.5
2011	20111495UNT6	1495	UNT6	L	C	R1	EDGE	1.75
2011	20111495UNT6	1495	UNT6	L	C	R2	EDGE	1.75
2011	20111495UNT6	1495	UNT6	L	C	R3	EDGE	0.75
2011	20111495UNT6	1495	UNT6	L	C	R4	EDGE	3.25
2011	20111495UNT6	1495	UNT6	L	C	R5	EDGE	2.25
2011	20111495UNTA	1495	UNTA	L	C	R1	INT	NA
2011	20111495UNTA	1495	UNTA	L	C	R2	INT	NA
2011	20111495UNTA	1495	UNTA	L	C	R3	INT	2.75
2011	20111495UNTA	1495	UNTA	L	C	R4	INT	2.25
2011	20111495UNTA	1495	UNTA	L	C	R5	INT	8.25
2011	20111495UNTB	1495	UNTB	L	C	R1	INT	NA
2011	20111495UNTB	1495	UNTB	L	C	R2	INT	NA
2011	20111495UNTB	1495	UNTB	L	C	R3	INT	3.25
2011	20111495UNTB	1495	UNTB	L	C	R4	INT	2.5
2011	20111495UNTB	1495	UNTB	L	C	R5	INT	8.25
2011	20111495UNTC	1495	UNTC	L	C	R1	INT	NA
2011	20111495UNTC	1495	UNTC	L	C	R2	INT	NA
2011	20111495UNTC	1495	UNTC	L	C	R3	INT	5.25
2011	20111495UNTC	1495	UNTC	L	C	R4	INT	3.5
2011	20111495UNTC	1495	UNTC	L	C	R5	INT	10
2011	20111495UNTD	1495	UNTD	L	C	R1	EDGE	NA
2011	20111495UNTD	1495	UNTD	L	C	R2	EDGE	NA
2011	20111495UNTD	1495	UNTD	L	C	R3	EDGE	8
2011	20111495UNTD	1495	UNTD	L	C	R4	EDGE	6.25
2011	20111495UNTD	1495	UNTD	L	C	R5	EDGE	9.75
2011	20111495UNTE	1495	UNTE	L	C	R1	EDGE	NA
2011	20111495UNTE	1495	UNTE	L	C	R2	EDGE	NA
2011	20111495UNTE	1495	UNTE	L	C	R3	EDGE	1.5
2011	20111495UNTE	1495	UNTE	L	C	R4	EDGE	3.25
2011	20111495UNTE	1495	UNTE	L	C	R5	EDGE	21
2011	20111495UNTF	1495	UNTF	L	C	R1	EDGE	NA
2011	20111495UNTF	1495	UNTF	L	C	R2	EDGE	NA
2011	20111495UNTF	1495	UNTF	L	C	R3	EDGE	2
2011	20111495UNTF	1495	UNTF	L	C	R4	EDGE	1
2011	20111495UNTF	1495	UNTF	L	C	R5	EDGE	6
2011	20111548MCT1	1548	MCT1	L	I	R1	CAN	2.416666667
2011	20111548MCT1	1548	MCT1	L	I	R2	CAN	3.166666667
2011	20111548MCT1	1548	MCT1	L	I	R3	CAN	3.333333333
2011	20111548MCT1	1548	MCT1	L	I	R4	CAN	5.75
2011	20111548MCT1	1548	MCT1	L	I	R5	CAN	6
2011	20111548MCT2	1548	MCT2	L	I	R1	CAN	2.155172414
2011	20111548MCT2	1548	MCT2	L	I	R2	CAN	6.833333333
2011	20111548MCT2	1548	MCT2	L	I	R3	CAN	3.333333333
2011	20111548MCT2	1548	MCT2	L	I	R4	CAN	4.083333333
2011	20111548MCT2	1548	MCT2	L	I	R5	CAN	4.333333333
2011	20111548UNT1	1548	UNT1	L	I	R1	INT	6
2011	20111548UNT1	1548	UNT1	L	I	R2	INT	2.25
2011	20111548UNT1	1548	UNT1	L	I	R3	INT	4.75
2011	20111548UNT1	1548	UNT1	L	I	R4	INT	7.75
2011	20111548UNT1	1548	UNT1	L	I	R5	INT	5.25
2011	20111548UNT2	1548	UNT2	L	I	R1	INT	9.75
2011	20111548UNT2	1548	UNT2	L	I	R2	INT	10
2011	20111548UNT2	1548	UNT2	L	I	R3	INT	13.75
2011	20111548UNT2	1548	UNT2	L	I	R4	INT	21.5
2011	20111548UNT2	1548	UNT2	L	I	R5	INT	6.5
2011	20111548UNT3	1548	UNT3	L	I	R1	INT	11
2011	20111548UNT3	1548	UNT3	L	I	R2	INT	11.75
2011	20111548UNT3	1548	UNT3	L	I	R3	INT	7.25
2011	20111548UNT3	1548	UNT3	L	I	R4	INT	21
2011	20111548UNT3	1548	UNT3	L	I	R5	INT	20.25
2011	20111548UNT4	1548	UNT4	L	I	R1	EDGE	1.5
2011	20111548UNT4	1548	UNT4	L	I	R2	EDGE	1.25
2011	20111548UNT4	1548	UNT4	L	I	R3	EDGE	4.25
2011	20111548UNT4	1548	UNT4	L	I	R4	EDGE	2
2011	20111548UNT4	1548	UNT4	L	I	R5	EDGE	4.5
2011	20111548UNT5	1548	UNT5	L	I	R1	EDGE	1.25
2011	20111548UNT5	1548	UNT5	L	I	R2	EDGE	0.555555556
2011	20111548UNT5	1548	UNT5	L	I	R3	EDGE	2
2011	20111548UNT5	1548	UNT5	L	I	R4	EDGE	1
2011	20111548UNT5	1548	UNT5	L	I	R5	EDGE	11.5
2011	20111548UNT6	1548	UNT6	L	I	R1	EDGE	2.25
2011	20111548UNT6	1548	UNT6	L	I	R2	EDGE	6
2011	20111548UNT6	1548	UNT6	L	I	R3	EDGE	6.25
2011	20111548UNT6	1548	UNT6	L	I	R4	EDGE	1.5
2011	20111548UNT6	1548	UNT6	L	I	R5	EDGE	4.25
2011	20111548UNTA	1548	UNTA	L	I	R1	INT	NA
2011	20111548UNTA	1548	UNTA	L	I	R2	INT	NA
2011	20111548UNTA	1548	UNTA	L	I	R3	INT	10.75
2011	20111548UNTA	1548	UNTA	L	I	R4	INT	10
2011	20111548UNTA	1548	UNTA	L	I	R5	INT	9
2011	20111548UNTB	1548	UNTB	L	I	R1	INT	NA
2011	20111548UNTB	1548	UNTB	L	I	R2	INT	NA
2011	20111548UNTB	1548	UNTB	L	I	R3	INT	3.75
2011	20111548UNTB	1548	UNTB	L	I	R4	INT	7.5
2011	20111548UNTB	1548	UNTB	L	I	R5	INT	8.75
2011	20111548UNTC	1548	UNTC	L	I	R1	INT	NA
2011	20111548UNTC	1548	UNTC	L	I	R2	INT	NA
2011	20111548UNTC	1548	UNTC	L	I	R3	INT	19
2011	20111548UNTC	1548	UNTC	L	I	R4	INT	15
2011	20111548UNTC	1548	UNTC	L	I	R5	INT	19.75
2011	20111548UNTD	1548	UNTD	L	I	R1	EDGE	NA
2011	20111548UNTD	1548	UNTD	L	I	R2	EDGE	NA
2011	20111548UNTD	1548	UNTD	L	I	R3	EDGE	6.75
2011	20111548UNTD	1548	UNTD	L	I	R4	EDGE	8.25
2011	20111548UNTD	1548	UNTD	L	I	R5	EDGE	2.75
2011	20111548UNTE	1548	UNTE	L	I	R1	EDGE	NA
2011	20111548UNTE	1548	UNTE	L	I	R2	EDGE	NA
2011	20111548UNTE	1548	UNTE	L	I	R3	EDGE	11
2011	20111548UNTE	1548	UNTE	L	I	R4	EDGE	4.5
2011	20111548UNTE	1548	UNTE	L	I	R5	EDGE	12.25
2011	20111548UNTF	1548	UNTF	L	I	R1	EDGE	NA
2011	20111548UNTF	1548	UNTF	L	I	R2	EDGE	NA
2011	20111548UNTF	1548	UNTF	L	I	R3	EDGE	2.25
2011	20111548UNTF	1548	UNTF	L	I	R4	EDGE	4.25
2011	20111548UNTF	1548	UNTF	L	I	R5	EDGE	0.75
2011	20111687MCT1	1687	MCT1	S	I	R1	CAN	6.416666667
2011	20111687MCT1	1687	MCT1	S	I	R2	CAN	4.75
2011	20111687MCT1	1687	MCT1	S	I	R3	CAN	4.166666667
2011	20111687MCT1	1687	MCT1	S	I	R4	CAN	5.166666667
2011	20111687MCT1	1687	MCT1	S	I	R5	CAN	9
2011	20111687MCT2	1687	MCT2	S	I	R1	CAN	3.166666667
2011	20111687MCT2	1687	MCT2	S	I	R2	CAN	7.166666667
2011	20111687MCT2	1687	MCT2	S	I	R3	CAN	2.166666667
2011	20111687MCT2	1687	MCT2	S	I	R4	CAN	1.25
2011	20111687MCT2	1687	MCT2	S	I	R5	CAN	2.5
2011	20111687UNT1	1687	UNT1	S	I	R1	INT	9
2011	20111687UNT1	1687	UNT1	S	I	R2	INT	3
2011	20111687UNT1	1687	UNT1	S	I	R3	INT	5.5
2011	20111687UNT1	1687	UNT1	S	I	R4	INT	3.75
2011	20111687UNT1	1687	UNT1	S	I	R5	INT	5.5
2011	20111687UNT2	1687	UNT2	S	I	R1	INT	14.25
2011	20111687UNT2	1687	UNT2	S	I	R2	INT	5.25
2011	20111687UNT2	1687	UNT2	S	I	R3	INT	20
2011	20111687UNT2	1687	UNT2	S	I	R4	INT	23.5
2011	20111687UNT2	1687	UNT2	S	I	R5	INT	5.75
2011	20111687UNT3	1687	UNT3	S	I	R1	INT	12.5
2011	20111687UNT3	1687	UNT3	S	I	R2	INT	3.75
2011	20111687UNT3	1687	UNT3	S	I	R3	INT	4.5
2011	20111687UNT3	1687	UNT3	S	I	R4	INT	6.25
2011	20111687UNT3	1687	UNT3	S	I	R5	INT	6.5
2011	20111687UNT4	1687	UNT4	S	I	R1	EDGE	5.25
2011	20111687UNT4	1687	UNT4	S	I	R2	EDGE	0.75
2011	20111687UNT4	1687	UNT4	S	I	R3	EDGE	2.5
2011	20111687UNT4	1687	UNT4	S	I	R4	EDGE	1.5
2011	20111687UNT4	1687	UNT4	S	I	R5	EDGE	5
2011	20111687UNT5	1687	UNT5	S	I	R1	EDGE	8.5
2011	20111687UNT5	1687	UNT5	S	I	R2	EDGE	1.25
2011	20111687UNT5	1687	UNT5	S	I	R3	EDGE	8.5
2011	20111687UNT5	1687	UNT5	S	I	R4	EDGE	7.25
2011	20111687UNT5	1687	UNT5	S	I	R5	EDGE	13.75
2011	20111687UNT6	1687	UNT6	S	I	R1	EDGE	8
2011	20111687UNT6	1687	UNT6	S	I	R2	EDGE	4.25
2011	20111687UNT6	1687	UNT6	S	I	R3	EDGE	5.75
2011	20111687UNT6	1687	UNT6	S	I	R4	EDGE	2
2011	20111687UNT6	1687	UNT6	S	I	R5	EDGE	16.5
2011	20111687UNTA	1687	UNTA	S	I	R1	INT	NA
2011	20111687UNTA	1687	UNTA	S	I	R2	INT	NA
2011	20111687UNTA	1687	UNTA	S	I	R3	INT	9.25
2011	20111687UNTA	1687	UNTA	S	I	R4	INT	6.5
2011	20111687UNTA	1687	UNTA	S	I	R5	INT	5.75
2011	20111687UNTB	1687	UNTB	S	I	R1	INT	NA
2011	20111687UNTB	1687	UNTB	S	I	R2	INT	NA
2011	20111687UNTB	1687	UNTB	S	I	R3	INT	3.75
2011	20111687UNTB	1687	UNTB	S	I	R4	INT	8.5
2011	20111687UNTB	1687	UNTB	S	I	R5	INT	6.5
2011	20111687UNTC	1687	UNTC	S	I	R1	INT	NA
2011	20111687UNTC	1687	UNTC	S	I	R2	INT	NA
2011	20111687UNTC	1687	UNTC	S	I	R3	INT	7.5
2011	20111687UNTC	1687	UNTC	S	I	R4	INT	9
2011	20111687UNTC	1687	UNTC	S	I	R5	INT	10.5
2011	20111687UNTD	1687	UNTD	S	I	R1	EDGE	NA
2011	20111687UNTD	1687	UNTD	S	I	R2	EDGE	NA
2011	20111687UNTD	1687	UNTD	S	I	R3	EDGE	12.25
2011	20111687UNTD	1687	UNTD	S	I	R4	EDGE	15
2011	20111687UNTD	1687	UNTD	S	I	R5	EDGE	27.25
2011	20111687UNTE	1687	UNTE	S	I	R1	EDGE	NA
2011	20111687UNTE	1687	UNTE	S	I	R2	EDGE	NA
2011	20111687UNTE	1687	UNTE	S	I	R3	EDGE	7.25
2011	20111687UNTE	1687	UNTE	S	I	R4	EDGE	1
2011	20111687UNTE	1687	UNTE	S	I	R5	EDGE	7.5
2011	20111687UNTF	1687	UNTF	S	I	R1	EDGE	NA
2011	20111687UNTF	1687	UNTF	S	I	R2	EDGE	NA
2011	20111687UNTF	1687	UNTF	S	I	R3	EDGE	9
2011	20111687UNTF	1687	UNTF	S	I	R4	EDGE	7.5
2011	20111687UNTF	1687	UNTF	S	I	R5	EDGE	6
2011	20111770MCT1	1770	MCT1	S	I	R1	CAN	7.583333333
2011	20111770MCT1	1770	MCT1	S	I	R2	CAN	1.75
2011	20111770MCT1	1770	MCT1	S	I	R3	CAN	2.333333333
2011	20111770MCT1	1770	MCT1	S	I	R4	CAN	0.75
2011	20111770MCT1	1770	MCT1	S	I	R5	CAN	4
2011	20111770MCT2	1770	MCT2	S	I	R1	CAN	3.416666667
2011	20111770MCT2	1770	MCT2	S	I	R2	CAN	1.416666667
2011	20111770MCT2	1770	MCT2	S	I	R3	CAN	1.120689655
2011	20111770MCT2	1770	MCT2	S	I	R4	CAN	0.333333333
2011	20111770MCT2	1770	MCT2	S	I	R5	CAN	0.916666667
2011	20111770UNT1	1770	UNT1	S	I	R1	INT	3.75
2011	20111770UNT1	1770	UNT1	S	I	R2	INT	3.5
2011	20111770UNT1	1770	UNT1	S	I	R3	INT	0.75
2011	20111770UNT1	1770	UNT1	S	I	R4	INT	6.5
2011	20111770UNT1	1770	UNT1	S	I	R5	INT	1
2011	20111770UNT2	1770	UNT2	S	I	R1	INT	2.5
2011	20111770UNT2	1770	UNT2	S	I	R2	INT	4
2011	20111770UNT2	1770	UNT2	S	I	R3	INT	4.25
2011	20111770UNT2	1770	UNT2	S	I	R4	INT	1
2011	20111770UNT2	1770	UNT2	S	I	R5	INT	3.75
2011	20111770UNT3	1770	UNT3	S	I	R1	INT	4.75
2011	20111770UNT3	1770	UNT3	S	I	R2	INT	0.75
2011	20111770UNT3	1770	UNT3	S	I	R3	INT	8
2011	20111770UNT3	1770	UNT3	S	I	R4	INT	2.25
2011	20111770UNT3	1770	UNT3	S	I	R5	INT	3.75
2011	20111770UNT4	1770	UNT4	S	I	R1	EDGE	4.5
2011	20111770UNT4	1770	UNT4	S	I	R2	EDGE	2.5
2011	20111770UNT4	1770	UNT4	S	I	R3	EDGE	0.5
2011	20111770UNT4	1770	UNT4	S	I	R4	EDGE	1
2011	20111770UNT4	1770	UNT4	S	I	R5	EDGE	11.5
2011	20111770UNT5	1770	UNT5	S	I	R1	EDGE	4.75
2011	20111770UNT5	1770	UNT5	S	I	R2	EDGE	2.5
2011	20111770UNT5	1770	UNT5	S	I	R3	EDGE	1.25
2011	20111770UNT5	1770	UNT5	S	I	R4	EDGE	8
2011	20111770UNT5	1770	UNT5	S	I	R5	EDGE	1.5
2011	20111770UNT6	1770	UNT6	S	I	R1	EDGE	2.5
2011	20111770UNT6	1770	UNT6	S	I	R2	EDGE	1.5
2011	20111770UNT6	1770	UNT6	S	I	R3	EDGE	0.75
2011	20111770UNT6	1770	UNT6	S	I	R4	EDGE	1.5
2011	20111770UNT6	1770	UNT6	S	I	R5	EDGE	0.5
2011	20111770UNTA	1770	UNTA	S	I	R1	INT	NA
2011	20111770UNTA	1770	UNTA	S	I	R2	INT	NA
2011	20111770UNTA	1770	UNTA	S	I	R3	INT	9.75
2011	20111770UNTA	1770	UNTA	S	I	R4	INT	1.5
2011	20111770UNTA	1770	UNTA	S	I	R5	INT	0.277777778
2011	20111770UNTB	1770	UNTB	S	I	R1	INT	NA
2011	20111770UNTB	1770	UNTB	S	I	R2	INT	NA
2011	20111770UNTB	1770	UNTB	S	I	R3	INT	5.75
2011	20111770UNTB	1770	UNTB	S	I	R4	INT	7.5
2011	20111770UNTB	1770	UNTB	S	I	R5	INT	2.5
2011	20111770UNTC	1770	UNTC	S	I	R1	INT	NA
2011	20111770UNTC	1770	UNTC	S	I	R2	INT	NA
2011	20111770UNTC	1770	UNTC	S	I	R3	INT	5.5
2011	20111770UNTC	1770	UNTC	S	I	R4	INT	1.25
2011	20111770UNTC	1770	UNTC	S	I	R5	INT	3.5
2011	20111770UNTD	1770	UNTD	S	I	R1	EDGE	NA
2011	20111770UNTD	1770	UNTD	S	I	R2	EDGE	NA
2011	20111770UNTD	1770	UNTD	S	I	R3	EDGE	5
2011	20111770UNTD	1770	UNTD	S	I	R4	EDGE	1.25
2011	20111770UNTD	1770	UNTD	S	I	R5	EDGE	2
2011	20111770UNTE	1770	UNTE	S	I	R1	EDGE	NA
2011	20111770UNTE	1770	UNTE	S	I	R2	EDGE	NA
2011	20111770UNTE	1770	UNTE	S	I	R3	EDGE	0.5
2011	20111770UNTE	1770	UNTE	S	I	R4	EDGE	0.5
2011	20111770UNTE	1770	UNTE	S	I	R5	EDGE	0.5
2011	20111770UNTF	1770	UNTF	S	I	R1	EDGE	NA
2011	20111770UNTF	1770	UNTF	S	I	R2	EDGE	NA
2011	20111770UNTF	1770	UNTF	S	I	R3	EDGE	9.25
2011	20111770UNTF	1770	UNTF	S	I	R4	EDGE	6.5
2011	20111770UNTF	1770	UNTF	S	I	R5	EDGE	2.5
2011	20111801MCT1	1801	MCT1	L	C	R1	CAN	3.583333333
2011	20111801MCT1	1801	MCT1	L	C	R2	CAN	2.25
2011	20111801MCT1	1801	MCT1	L	C	R3	CAN	5
2011	20111801MCT1	1801	MCT1	L	C	R4	CAN	1.833333333
2011	20111801MCT1	1801	MCT1	L	C	R5	CAN	4.333333333
2011	20111801MCT2	1801	MCT2	L	C	R1	CAN	4.666666667
2011	20111801MCT2	1801	MCT2	L	C	R2	CAN	3.416666667
2011	20111801MCT2	1801	MCT2	L	C	R3	CAN	4.416666667
2011	20111801MCT2	1801	MCT2	L	C	R4	CAN	5.25
2011	20111801MCT2	1801	MCT2	L	C	R5	CAN	9.5
2011	20111801UNT1	1801	UNT1	L	C	R1	INT	8.25
2011	20111801UNT1	1801	UNT1	L	C	R2	INT	7.5
2011	20111801UNT1	1801	UNT1	L	C	R3	INT	7.25
2011	20111801UNT1	1801	UNT1	L	C	R4	INT	9
2011	20111801UNT1	1801	UNT1	L	C	R5	INT	4
2011	20111801UNT2	1801	UNT2	L	C	R1	INT	6.5
2011	20111801UNT2	1801	UNT2	L	C	R2	INT	5.75
2011	20111801UNT2	1801	UNT2	L	C	R3	INT	10
2011	20111801UNT2	1801	UNT2	L	C	R4	INT	12.25
2011	20111801UNT2	1801	UNT2	L	C	R5	INT	2.5
2011	20111801UNT3	1801	UNT3	L	C	R1	INT	12.5
2011	20111801UNT3	1801	UNT3	L	C	R2	INT	1
2011	20111801UNT3	1801	UNT3	L	C	R3	INT	0.75
2011	20111801UNT3	1801	UNT3	L	C	R4	INT	3.25
2011	20111801UNT3	1801	UNT3	L	C	R5	INT	3.75
2011	20111801UNT4	1801	UNT4	L	C	R1	EDGE	4
2011	20111801UNT4	1801	UNT4	L	C	R2	EDGE	11.25
2011	20111801UNT4	1801	UNT4	L	C	R3	EDGE	8.5
2011	20111801UNT4	1801	UNT4	L	C	R4	EDGE	9.5
2011	20111801UNT4	1801	UNT4	L	C	R5	EDGE	18.25
2011	20111801UNT5	1801	UNT5	L	C	R1	EDGE	18.25
2011	20111801UNT5	1801	UNT5	L	C	R2	EDGE	7
2011	20111801UNT5	1801	UNT5	L	C	R3	EDGE	6.75
2011	20111801UNT5	1801	UNT5	L	C	R4	EDGE	12.5
2011	20111801UNT5	1801	UNT5	L	C	R5	EDGE	5.25
2011	20111801UNT6	1801	UNT6	L	C	R1	EDGE	26.5
2011	20111801UNT6	1801	UNT6	L	C	R2	EDGE	16.75
2011	20111801UNT6	1801	UNT6	L	C	R3	EDGE	53.25
2011	20111801UNT6	1801	UNT6	L	C	R4	EDGE	19
2011	20111801UNT6	1801	UNT6	L	C	R5	EDGE	45
2011	20111801UNTA	1801	UNTA	L	C	R1	INT	NA
2011	20111801UNTA	1801	UNTA	L	C	R2	INT	NA
2011	20111801UNTA	1801	UNTA	L	C	R3	INT	2.75
2011	20111801UNTA	1801	UNTA	L	C	R4	INT	3
2011	20111801UNTA	1801	UNTA	L	C	R5	INT	7.5
2011	20111801UNTB	1801	UNTB	L	C	R1	INT	NA
2011	20111801UNTB	1801	UNTB	L	C	R2	INT	NA
2011	20111801UNTB	1801	UNTB	L	C	R3	INT	18.75
2011	20111801UNTB	1801	UNTB	L	C	R4	INT	20.5
2011	20111801UNTB	1801	UNTB	L	C	R5	INT	15.75
2011	20111801UNTC	1801	UNTC	L	C	R1	INT	NA
2011	20111801UNTC	1801	UNTC	L	C	R2	INT	NA
2011	20111801UNTC	1801	UNTC	L	C	R3	INT	12.5
2011	20111801UNTC	1801	UNTC	L	C	R4	INT	6.25
2011	20111801UNTC	1801	UNTC	L	C	R5	INT	1.5
2011	20111801UNTD	1801	UNTD	L	C	R1	EDGE	NA
2011	20111801UNTD	1801	UNTD	L	C	R2	EDGE	NA
2011	20111801UNTD	1801	UNTD	L	C	R3	EDGE	4.5
2011	20111801UNTD	1801	UNTD	L	C	R4	EDGE	16.25
2011	20111801UNTD	1801	UNTD	L	C	R5	EDGE	22.75
2011	20111801UNTE	1801	UNTE	L	C	R1	EDGE	NA
2011	20111801UNTE	1801	UNTE	L	C	R2	EDGE	NA
2011	20111801UNTE	1801	UNTE	L	C	R3	EDGE	0.5
2011	20111801UNTE	1801	UNTE	L	C	R4	EDGE	9.5
2011	20111801UNTE	1801	UNTE	L	C	R5	EDGE	18
2011	20111801UNTF	1801	UNTF	L	C	R1	EDGE	NA
2011	20111801UNTF	1801	UNTF	L	C	R2	EDGE	NA
2011	20111801UNTF	1801	UNTF	L	C	R3	EDGE	2.5
2011	20111801UNTF	1801	UNTF	L	C	R4	EDGE	2.5
2011	20111801UNTF	1801	UNTF	L	C	R5	EDGE	2.25
2011	20111810MCT1	1810	MCT1	S	C	R1	CAN	6.416666667
2011	20111810MCT1	1810	MCT1	S	C	R2	CAN	3.666666667
2011	20111810MCT1	1810	MCT1	S	C	R3	CAN	8.666666667
2011	20111810MCT1	1810	MCT1	S	C	R4	CAN	2.333333333
2011	20111810MCT1	1810	MCT1	S	C	R5	CAN	4.083333333
2011	20111810MCT2	1810	MCT2	S	C	R1	CAN	1.333333333
2011	20111810MCT2	1810	MCT2	S	C	R2	CAN	0.603448276
2011	20111810MCT2	1810	MCT2	S	C	R3	CAN	0.25
2011	20111810MCT2	1810	MCT2	S	C	R4	CAN	1.5
2011	20111810MCT2	1810	MCT2	S	C	R5	CAN	0.833333333
2011	20111810UNT1	1810	UNT1	S	C	R1	INT	10.75
2011	20111810UNT1	1810	UNT1	S	C	R2	INT	4.5
2011	20111810UNT1	1810	UNT1	S	C	R3	INT	8.25
2011	20111810UNT1	1810	UNT1	S	C	R4	INT	9.75
2011	20111810UNT1	1810	UNT1	S	C	R5	INT	4.25
2011	20111810UNT2	1810	UNT2	S	C	R1	INT	7.25
2011	20111810UNT2	1810	UNT2	S	C	R2	INT	5.75
2011	20111810UNT2	1810	UNT2	S	C	R3	INT	12.25
2011	20111810UNT2	1810	UNT2	S	C	R4	INT	11.5
2011	20111810UNT2	1810	UNT2	S	C	R5	INT	7.75
2011	20111810UNT3	1810	UNT3	S	C	R1	INT	6.25
2011	20111810UNT3	1810	UNT3	S	C	R2	INT	2
2011	20111810UNT3	1810	UNT3	S	C	R3	INT	3.75
2011	20111810UNT3	1810	UNT3	S	C	R4	INT	0.25
2011	20111810UNT3	1810	UNT3	S	C	R5	INT	3.75
2011	20111810UNT4	1810	UNT4	S	C	R1	EDGE	10
2011	20111810UNT4	1810	UNT4	S	C	R2	EDGE	4.5
2011	20111810UNT4	1810	UNT4	S	C	R3	EDGE	10
2011	20111810UNT4	1810	UNT4	S	C	R4	EDGE	3
2011	20111810UNT4	1810	UNT4	S	C	R5	EDGE	12.75
2011	20111810UNT5	1810	UNT5	S	C	R1	EDGE	1.25
2011	20111810UNT5	1810	UNT5	S	C	R2	EDGE	2.25
2011	20111810UNT5	1810	UNT5	S	C	R3	EDGE	0.5
2011	20111810UNT5	1810	UNT5	S	C	R4	EDGE	2
2011	20111810UNT5	1810	UNT5	S	C	R5	EDGE	4.75
2011	20111810UNT6	1810	UNT6	S	C	R1	EDGE	2
2011	20111810UNT6	1810	UNT6	S	C	R2	EDGE	0.75
2011	20111810UNT6	1810	UNT6	S	C	R3	EDGE	4.5
2011	20111810UNT6	1810	UNT6	S	C	R4	EDGE	1.75
2011	20111810UNT6	1810	UNT6	S	C	R5	EDGE	0.25
2011	20111810UNTA	1810	UNTA	S	C	R1	INT	NA
2011	20111810UNTA	1810	UNTA	S	C	R2	INT	NA
2011	20111810UNTA	1810	UNTA	S	C	R3	INT	16.75
2011	20111810UNTA	1810	UNTA	S	C	R4	INT	13.25
2011	20111810UNTA	1810	UNTA	S	C	R5	INT	11.75
2011	20111810UNTB	1810	UNTB	S	C	R1	INT	NA
2011	20111810UNTB	1810	UNTB	S	C	R2	INT	NA
2011	20111810UNTB	1810	UNTB	S	C	R3	INT	8.5
2011	20111810UNTB	1810	UNTB	S	C	R4	INT	6.75
2011	20111810UNTB	1810	UNTB	S	C	R5	INT	6.5
2011	20111810UNTC	1810	UNTC	S	C	R1	INT	NA
2011	20111810UNTC	1810	UNTC	S	C	R2	INT	NA
2011	20111810UNTC	1810	UNTC	S	C	R3	INT	1
2011	20111810UNTC	1810	UNTC	S	C	R4	INT	10.5
2011	20111810UNTC	1810	UNTC	S	C	R5	INT	10.25
2011	20111810UNTD	1810	UNTD	S	C	R1	EDGE	NA
2011	20111810UNTD	1810	UNTD	S	C	R2	EDGE	NA
2011	20111810UNTD	1810	UNTD	S	C	R3	EDGE	2.75
2011	20111810UNTD	1810	UNTD	S	C	R4	EDGE	0.25
2011	20111810UNTD	1810	UNTD	S	C	R5	EDGE	2.5
2011	20111810UNTE	1810	UNTE	S	C	R1	EDGE	NA
2011	20111810UNTE	1810	UNTE	S	C	R2	EDGE	NA
2011	20111810UNTE	1810	UNTE	S	C	R3	EDGE	10
2011	20111810UNTE	1810	UNTE	S	C	R4	EDGE	5.5
2011	20111810UNTE	1810	UNTE	S	C	R5	EDGE	15.5
2011	20111810UNTF	1810	UNTF	S	C	R1	EDGE	NA
2011	20111810UNTF	1810	UNTF	S	C	R2	EDGE	NA
2011	20111810UNTF	1810	UNTF	S	C	R3	EDGE	5
2011	20111810UNTF	1810	UNTF	S	C	R4	EDGE	3.75
2011	20111810UNTF	1810	UNTF	S	C	R5	EDGE	2.5
2011	20111818MCT1	1818	MCT1	L	I	R1	CAN	2.24137931
2011	20111818MCT1	1818	MCT1	L	I	R2	CAN	1.916666667
2011	20111818MCT1	1818	MCT1	L	I	R3	CAN	3.916666667
2011	20111818MCT1	1818	MCT1	L	I	R4	CAN	3.166666667
2011	20111818MCT1	1818	MCT1	L	I	R5	CAN	2.833333333
2011	20111818MCT2	1818	MCT2	L	I	R1	CAN	4.666666667
2011	20111818MCT2	1818	MCT2	L	I	R2	CAN	3.166666667
2011	20111818MCT2	1818	MCT2	L	I	R3	CAN	3.392857143
2011	20111818MCT2	1818	MCT2	L	I	R4	CAN	5.833333333
2011	20111818MCT2	1818	MCT2	L	I	R5	CAN	3.833333333
2011	20111818UNT1	1818	UNT1	L	I	R1	INT	1.5
2011	20111818UNT1	1818	UNT1	L	I	R2	INT	1.25
2011	20111818UNT1	1818	UNT1	L	I	R3	INT	7.25
2011	20111818UNT1	1818	UNT1	L	I	R4	INT	15.5
2011	20111818UNT1	1818	UNT1	L	I	R5	INT	0.5
2011	20111818UNT2	1818	UNT2	L	I	R1	INT	7.25
2011	20111818UNT2	1818	UNT2	L	I	R2	INT	3.75
2011	20111818UNT2	1818	UNT2	L	I	R3	INT	0.75
2011	20111818UNT2	1818	UNT2	L	I	R4	INT	9.5
2011	20111818UNT2	1818	UNT2	L	I	R5	INT	0.75
2011	20111818UNT3	1818	UNT3	L	I	R1	INT	0.75
2011	20111818UNT3	1818	UNT3	L	I	R2	INT	1.5
2011	20111818UNT3	1818	UNT3	L	I	R3	INT	0.5
2011	20111818UNT3	1818	UNT3	L	I	R4	INT	0.75
2011	20111818UNT3	1818	UNT3	L	I	R5	INT	0.5
2011	20111818UNT4	1818	UNT4	L	I	R1	EDGE	3.5
2011	20111818UNT4	1818	UNT4	L	I	R2	EDGE	2.5
2011	20111818UNT4	1818	UNT4	L	I	R3	EDGE	6.5
2011	20111818UNT4	1818	UNT4	L	I	R4	EDGE	8.25
2011	20111818UNT4	1818	UNT4	L	I	R5	EDGE	11.25
2011	20111818UNT5	1818	UNT5	L	I	R1	EDGE	17.25
2011	20111818UNT5	1818	UNT5	L	I	R2	EDGE	11.5
2011	20111818UNT5	1818	UNT5	L	I	R3	EDGE	6.75
2011	20111818UNT5	1818	UNT5	L	I	R4	EDGE	5.25
2011	20111818UNT5	1818	UNT5	L	I	R5	EDGE	14.25
2011	20111818UNT6	1818	UNT6	L	I	R1	EDGE	16.25
2011	20111818UNT6	1818	UNT6	L	I	R2	EDGE	16.25
2011	20111818UNT6	1818	UNT6	L	I	R3	EDGE	21
2011	20111818UNT6	1818	UNT6	L	I	R4	EDGE	19.25
2011	20111818UNT6	1818	UNT6	L	I	R5	EDGE	11.75
2011	20111818UNTA	1818	UNTA	L	I	R1	INT	NA
2011	20111818UNTA	1818	UNTA	L	I	R2	INT	NA
2011	20111818UNTA	1818	UNTA	L	I	R3	INT	3
2011	20111818UNTA	1818	UNTA	L	I	R4	INT	4
2011	20111818UNTA	1818	UNTA	L	I	R5	INT	1.25
2011	20111818UNTB	1818	UNTB	L	I	R1	INT	NA
2011	20111818UNTB	1818	UNTB	L	I	R2	INT	NA
2011	20111818UNTB	1818	UNTB	L	I	R3	INT	14.5
2011	20111818UNTB	1818	UNTB	L	I	R4	INT	9.5
2011	20111818UNTB	1818	UNTB	L	I	R5	INT	2.5
2011	20111818UNTC	1818	UNTC	L	I	R1	INT	NA
2011	20111818UNTC	1818	UNTC	L	I	R2	INT	NA
2011	20111818UNTC	1818	UNTC	L	I	R3	INT	5.25
2011	20111818UNTC	1818	UNTC	L	I	R4	INT	2.25
2011	20111818UNTC	1818	UNTC	L	I	R5	INT	0.5
2011	20111818UNTD	1818	UNTD	L	I	R1	EDGE	NA
2011	20111818UNTD	1818	UNTD	L	I	R2	EDGE	NA
2011	20111818UNTD	1818	UNTD	L	I	R3	EDGE	21
2011	20111818UNTD	1818	UNTD	L	I	R4	EDGE	12.75
2011	20111818UNTD	1818	UNTD	L	I	R5	EDGE	20.5
2011	20111818UNTE	1818	UNTE	L	I	R1	EDGE	NA
2011	20111818UNTE	1818	UNTE	L	I	R2	EDGE	NA
2011	20111818UNTE	1818	UNTE	L	I	R3	EDGE	21
2011	20111818UNTE	1818	UNTE	L	I	R4	EDGE	8.75
2011	20111818UNTE	1818	UNTE	L	I	R5	EDGE	10.75
2011	20111818UNTF	1818	UNTF	L	I	R1	EDGE	NA
2011	20111818UNTF	1818	UNTF	L	I	R2	EDGE	NA
2011	20111818UNTF	1818	UNTF	L	I	R3	EDGE	3.25
2011	20111818UNTF	1818	UNTF	L	I	R4	EDGE	4.5
2011	20111818UNTF	1818	UNTF	L	I	R5	EDGE	1
2011	20111828MCT1	1828	MCT1	S	C	R1	CAN	8.534482759
2011	20111828MCT1	1828	MCT1	S	C	R2	CAN	8.916666667
2011	20111828MCT1	1828	MCT1	S	C	R3	CAN	2.916666667
2011	20111828MCT1	1828	MCT1	S	C	R4	CAN	5.583333333
2011	20111828MCT1	1828	MCT1	S	C	R5	CAN	10.66666667
2011	20111828MCT2	1828	MCT2	S	C	R1	CAN	14.5
2011	20111828MCT2	1828	MCT2	S	C	R2	CAN	7.416666667
2011	20111828MCT2	1828	MCT2	S	C	R3	CAN	10
2011	20111828MCT2	1828	MCT2	S	C	R4	CAN	8.25
2011	20111828MCT2	1828	MCT2	S	C	R5	CAN	21.66666667
2011	20111828UNT1	1828	UNT1	S	C	R1	INT	6.25
2011	20111828UNT1	1828	UNT1	S	C	R2	INT	4.75
2011	20111828UNT1	1828	UNT1	S	C	R3	INT	8.5
2011	20111828UNT1	1828	UNT1	S	C	R4	INT	12.25
2011	20111828UNT1	1828	UNT1	S	C	R5	INT	22.75
2011	20111828UNT2	1828	UNT2	S	C	R1	INT	6
2011	20111828UNT2	1828	UNT2	S	C	R2	INT	9.75
2011	20111828UNT2	1828	UNT2	S	C	R3	INT	11.25
2011	20111828UNT2	1828	UNT2	S	C	R4	INT	7
2011	20111828UNT2	1828	UNT2	S	C	R5	INT	10.75
2011	20111828UNT3	1828	UNT3	S	C	R1	INT	5.25
2011	20111828UNT3	1828	UNT3	S	C	R2	INT	9.25
2011	20111828UNT3	1828	UNT3	S	C	R3	INT	3.75
2011	20111828UNT3	1828	UNT3	S	C	R4	INT	0.75
2011	20111828UNT3	1828	UNT3	S	C	R5	INT	1.5
2011	20111828UNT4	1828	UNT4	S	C	R1	EDGE	1.5
2011	20111828UNT4	1828	UNT4	S	C	R2	EDGE	3
2011	20111828UNT4	1828	UNT4	S	C	R3	EDGE	2.25
2011	20111828UNT4	1828	UNT4	S	C	R4	EDGE	0.75
2011	20111828UNT4	1828	UNT4	S	C	R5	EDGE	7.75
2011	20111828UNT5	1828	UNT5	S	C	R1	EDGE	12.75
2011	20111828UNT5	1828	UNT5	S	C	R2	EDGE	4.5
2011	20111828UNT5	1828	UNT5	S	C	R3	EDGE	8.75
2011	20111828UNT5	1828	UNT5	S	C	R4	EDGE	4
2011	20111828UNT5	1828	UNT5	S	C	R5	EDGE	8.25
2011	20111828UNT6	1828	UNT6	S	C	R1	EDGE	18.25
2011	20111828UNT6	1828	UNT6	S	C	R2	EDGE	3.5
2011	20111828UNT6	1828	UNT6	S	C	R3	EDGE	11.5
2011	20111828UNT6	1828	UNT6	S	C	R4	EDGE	10
2011	20111828UNT6	1828	UNT6	S	C	R5	EDGE	20.5
2011	20111828UNTA	1828	UNTA	S	C	R1	INT	NA
2011	20111828UNTA	1828	UNTA	S	C	R2	INT	NA
2011	20111828UNTA	1828	UNTA	S	C	R3	INT	4
2011	20111828UNTA	1828	UNTA	S	C	R4	INT	1
2011	20111828UNTA	1828	UNTA	S	C	R5	INT	8.5
2011	20111828UNTB	1828	UNTB	S	C	R1	INT	NA
2011	20111828UNTB	1828	UNTB	S	C	R2	INT	NA
2011	20111828UNTB	1828	UNTB	S	C	R3	INT	5.75
2011	20111828UNTB	1828	UNTB	S	C	R4	INT	3.5
2011	20111828UNTB	1828	UNTB	S	C	R5	INT	7.75
2011	20111828UNTC	1828	UNTC	S	C	R1	INT	NA
2011	20111828UNTC	1828	UNTC	S	C	R2	INT	NA
2011	20111828UNTC	1828	UNTC	S	C	R3	INT	11.75
2011	20111828UNTC	1828	UNTC	S	C	R4	INT	9
2011	20111828UNTC	1828	UNTC	S	C	R5	INT	10.5
2011	20111828UNTD	1828	UNTD	S	C	R1	EDGE	NA
2011	20111828UNTD	1828	UNTD	S	C	R2	EDGE	NA
2011	20111828UNTD	1828	UNTD	S	C	R3	EDGE	4.75
2011	20111828UNTD	1828	UNTD	S	C	R4	EDGE	11.25
2011	20111828UNTD	1828	UNTD	S	C	R5	EDGE	11.5
2011	20111828UNTE	1828	UNTE	S	C	R1	EDGE	NA
2011	20111828UNTE	1828	UNTE	S	C	R2	EDGE	NA
2011	20111828UNTE	1828	UNTE	S	C	R3	EDGE	2
2011	20111828UNTE	1828	UNTE	S	C	R4	EDGE	1.75
2011	20111828UNTE	1828	UNTE	S	C	R5	EDGE	6.75
2011	20111828UNTF	1828	UNTF	S	C	R1	EDGE	NA
2011	20111828UNTF	1828	UNTF	S	C	R2	EDGE	NA
2011	20111828UNTF	1828	UNTF	S	C	R3	EDGE	1.5
2011	20111828UNTF	1828	UNTF	S	C	R4	EDGE	0
2011	20111828UNTF	1828	UNTF	S	C	R5	EDGE	9.25
2011	20111837MCT1	1837	MCT1	S	I	R1	CAN	6.7
2011	20111837MCT1	1837	MCT1	S	I	R2	CAN	3.333333333
2011	20111837MCT1	1837	MCT1	S	I	R3	CAN	4.051724138
2011	20111837MCT1	1837	MCT1	S	I	R4	CAN	2.666666667
2011	20111837MCT1	1837	MCT1	S	I	R5	CAN	10.33333333
2011	20111837MCT2	1837	MCT2	S	I	R1	CAN	5.689655172
2011	20111837MCT2	1837	MCT2	S	I	R2	CAN	2.916666667
2011	20111837MCT2	1837	MCT2	S	I	R3	CAN	1.833333333
2011	20111837MCT2	1837	MCT2	S	I	R4	CAN	4.25
2011	20111837MCT2	1837	MCT2	S	I	R5	CAN	8.25
2011	20111837UNT1	1837	UNT1	S	I	R1	INT	11.5
2011	20111837UNT1	1837	UNT1	S	I	R2	INT	6.25
2011	20111837UNT1	1837	UNT1	S	I	R3	INT	6.75
2011	20111837UNT1	1837	UNT1	S	I	R4	INT	14.25
2011	20111837UNT1	1837	UNT1	S	I	R5	INT	3.5
2011	20111837UNT2	1837	UNT2	S	I	R1	INT	16
2011	20111837UNT2	1837	UNT2	S	I	R2	INT	7
2011	20111837UNT2	1837	UNT2	S	I	R3	INT	19
2011	20111837UNT2	1837	UNT2	S	I	R4	INT	10.25
2011	20111837UNT2	1837	UNT2	S	I	R5	INT	13.25
2011	20111837UNT3	1837	UNT3	S	I	R1	INT	11.25
2011	20111837UNT3	1837	UNT3	S	I	R2	INT	6
2011	20111837UNT3	1837	UNT3	S	I	R3	INT	24.75
2011	20111837UNT3	1837	UNT3	S	I	R4	INT	12
2011	20111837UNT3	1837	UNT3	S	I	R5	INT	9
2011	20111837UNT4	1837	UNT4	S	I	R1	EDGE	1.75
2011	20111837UNT4	1837	UNT4	S	I	R2	EDGE	1.25
2011	20111837UNT4	1837	UNT4	S	I	R3	EDGE	2
2011	20111837UNT4	1837	UNT4	S	I	R4	EDGE	2.5
2011	20111837UNT4	1837	UNT4	S	I	R5	EDGE	1.25
2011	20111837UNT5	1837	UNT5	S	I	R1	EDGE	4.75
2011	20111837UNT5	1837	UNT5	S	I	R2	EDGE	2
2011	20111837UNT5	1837	UNT5	S	I	R3	EDGE	1.5
2011	20111837UNT5	1837	UNT5	S	I	R4	EDGE	0
2011	20111837UNT5	1837	UNT5	S	I	R5	EDGE	6.75
2011	20111837UNT6	1837	UNT6	S	I	R1	EDGE	2
2011	20111837UNT6	1837	UNT6	S	I	R2	EDGE	0.5
2011	20111837UNT6	1837	UNT6	S	I	R3	EDGE	2
2011	20111837UNT6	1837	UNT6	S	I	R4	EDGE	2.75
2011	20111837UNT6	1837	UNT6	S	I	R5	EDGE	15
2011	20111837UNTA	1837	UNTA	S	I	R1	INT	NA
2011	20111837UNTA	1837	UNTA	S	I	R2	INT	NA
2011	20111837UNTA	1837	UNTA	S	I	R3	INT	7
2011	20111837UNTA	1837	UNTA	S	I	R4	INT	5.5
2011	20111837UNTA	1837	UNTA	S	I	R5	INT	14.75
2011	20111837UNTB	1837	UNTB	S	I	R1	INT	NA
2011	20111837UNTB	1837	UNTB	S	I	R2	INT	NA
2011	20111837UNTB	1837	UNTB	S	I	R3	INT	3.75
2011	20111837UNTB	1837	UNTB	S	I	R4	INT	2
2011	20111837UNTB	1837	UNTB	S	I	R5	INT	8
2011	20111837UNTC	1837	UNTC	S	I	R1	INT	NA
2011	20111837UNTC	1837	UNTC	S	I	R2	INT	NA
2011	20111837UNTC	1837	UNTC	S	I	R3	INT	15.75
2011	20111837UNTC	1837	UNTC	S	I	R4	INT	6.75
2011	20111837UNTC	1837	UNTC	S	I	R5	INT	9
2011	20111837UNTD	1837	UNTD	S	I	R1	EDGE	NA
2011	20111837UNTD	1837	UNTD	S	I	R2	EDGE	NA
2011	20111837UNTD	1837	UNTD	S	I	R3	EDGE	2.75
2011	20111837UNTD	1837	UNTD	S	I	R4	EDGE	5.75
2011	20111837UNTD	1837	UNTD	S	I	R5	EDGE	13.75
2011	20111837UNTE	1837	UNTE	S	I	R1	EDGE	NA
2011	20111837UNTE	1837	UNTE	S	I	R2	EDGE	NA
2011	20111837UNTE	1837	UNTE	S	I	R3	EDGE	2.5
2011	20111837UNTE	1837	UNTE	S	I	R4	EDGE	2.75
2011	20111837UNTE	1837	UNTE	S	I	R5	EDGE	9.5
2011	20111837UNTF	1837	UNTF	S	I	R1	EDGE	NA
2011	20111837UNTF	1837	UNTF	S	I	R2	EDGE	NA
2011	20111837UNTF	1837	UNTF	S	I	R3	EDGE	1.5
2011	20111837UNTF	1837	UNTF	S	I	R4	EDGE	0.75
2011	20111837UNTF	1837	UNTF	S	I	R5	EDGE	8.5
2011	20111933MCT1	1933	MCT1	S	I	R1	CAN	4.396551724
2011	20111933MCT1	1933	MCT1	S	I	R2	CAN	4.666666667
2011	20111933MCT1	1933	MCT1	S	I	R3	CAN	4.416666667
2011	20111933MCT1	1933	MCT1	S	I	R4	CAN	3.833333333
2011	20111933MCT1	1933	MCT1	S	I	R5	CAN	6.416666667
2011	20111933MCT2	1933	MCT2	S	I	R1	CAN	3.362068966
2011	20111933MCT2	1933	MCT2	S	I	R2	CAN	4.666666667
2011	20111933MCT2	1933	MCT2	S	I	R3	CAN	4.333333333
2011	20111933MCT2	1933	MCT2	S	I	R4	CAN	3.793103448
2011	20111933MCT2	1933	MCT2	S	I	R5	CAN	5.916666667
2011	20111933UNT1	1933	UNT1	S	I	R1	INT	13.25
2011	20111933UNT1	1933	UNT1	S	I	R2	INT	10
2011	20111933UNT1	1933	UNT1	S	I	R3	INT	11.25
2011	20111933UNT1	1933	UNT1	S	I	R4	INT	15
2011	20111933UNT1	1933	UNT1	S	I	R5	INT	12.5
2011	20111933UNT2	1933	UNT2	S	I	R1	INT	4.75
2011	20111933UNT2	1933	UNT2	S	I	R2	INT	7.5
2011	20111933UNT2	1933	UNT2	S	I	R3	INT	7.25
2011	20111933UNT2	1933	UNT2	S	I	R4	INT	12
2011	20111933UNT2	1933	UNT2	S	I	R5	INT	10.75
2011	20111933UNT3	1933	UNT3	S	I	R1	INT	15.5
2011	20111933UNT3	1933	UNT3	S	I	R2	INT	9.75
2011	20111933UNT3	1933	UNT3	S	I	R3	INT	13
2011	20111933UNT3	1933	UNT3	S	I	R4	INT	6.5
2011	20111933UNT3	1933	UNT3	S	I	R5	INT	12.25
2011	20111933UNT4	1933	UNT4	S	I	R1	EDGE	22.25
2011	20111933UNT4	1933	UNT4	S	I	R2	EDGE	15.75
2011	20111933UNT4	1933	UNT4	S	I	R3	EDGE	15.5
2011	20111933UNT4	1933	UNT4	S	I	R4	EDGE	6.5
2011	20111933UNT4	1933	UNT4	S	I	R5	EDGE	44
2011	20111933UNT5	1933	UNT5	S	I	R1	EDGE	23.25
2011	20111933UNT5	1933	UNT5	S	I	R2	EDGE	18.75
2011	20111933UNT5	1933	UNT5	S	I	R3	EDGE	28.25
2011	20111933UNT5	1933	UNT5	S	I	R4	EDGE	13.75
2011	20111933UNT5	1933	UNT5	S	I	R5	EDGE	24.25
2011	20111933UNT6	1933	UNT6	S	I	R1	EDGE	18.75
2011	20111933UNT6	1933	UNT6	S	I	R2	EDGE	8
2011	20111933UNT6	1933	UNT6	S	I	R3	EDGE	8
2011	20111933UNT6	1933	UNT6	S	I	R4	EDGE	0.5
2011	20111933UNT6	1933	UNT6	S	I	R5	EDGE	10.25
2011	20111933UNTA	1933	UNTA	S	I	R1	INT	NA
2011	20111933UNTA	1933	UNTA	S	I	R2	INT	NA
2011	20111933UNTA	1933	UNTA	S	I	R3	INT	10
2011	20111933UNTA	1933	UNTA	S	I	R4	INT	18.5
2011	20111933UNTA	1933	UNTA	S	I	R5	INT	13.25
2011	20111933UNTB	1933	UNTB	S	I	R1	INT	NA
2011	20111933UNTB	1933	UNTB	S	I	R2	INT	NA
2011	20111933UNTB	1933	UNTB	S	I	R3	INT	21
2011	20111933UNTB	1933	UNTB	S	I	R4	INT	3.5
2011	20111933UNTB	1933	UNTB	S	I	R5	INT	32
2011	20111933UNTC	1933	UNTC	S	I	R1	INT	NA
2011	20111933UNTC	1933	UNTC	S	I	R2	INT	NA
2011	20111933UNTC	1933	UNTC	S	I	R3	INT	25.5
2011	20111933UNTC	1933	UNTC	S	I	R4	INT	24.75
2011	20111933UNTC	1933	UNTC	S	I	R5	INT	19.5
2011	20111933UNTD	1933	UNTD	S	I	R1	EDGE	NA
2011	20111933UNTD	1933	UNTD	S	I	R2	EDGE	NA
2011	20111933UNTD	1933	UNTD	S	I	R3	EDGE	16
2011	20111933UNTD	1933	UNTD	S	I	R4	EDGE	11.75
2011	20111933UNTD	1933	UNTD	S	I	R5	EDGE	18.5
2011	20111933UNTE	1933	UNTE	S	I	R1	EDGE	NA
2011	20111933UNTE	1933	UNTE	S	I	R2	EDGE	NA
2011	20111933UNTE	1933	UNTE	S	I	R3	EDGE	15.25
2011	20111933UNTE	1933	UNTE	S	I	R4	EDGE	24
2011	20111933UNTE	1933	UNTE	S	I	R5	EDGE	21
2011	20111933UNTF	1933	UNTF	S	I	R1	EDGE	NA
2011	20111933UNTF	1933	UNTF	S	I	R2	EDGE	NA
2011	20111933UNTF	1933	UNTF	S	I	R3	EDGE	0
2011	20111933UNTF	1933	UNTF	S	I	R4	EDGE	11.75
2011	20111933UNTF	1933	UNTF	S	I	R5	EDGE	30.25
2011	20111942MCT1	1942	MCT1	L	I	R1	CAN	4.583333333
2011	20111942MCT1	1942	MCT1	L	I	R2	CAN	3.75
2011	20111942MCT1	1942	MCT1	L	I	R3	CAN	6.120689655
2011	20111942MCT1	1942	MCT1	L	I	R4	CAN	3.25
2011	20111942MCT1	1942	MCT1	L	I	R5	CAN	2.416666667
2011	20111942MCT2	1942	MCT2	L	I	R1	CAN	10.16666667
2011	20111942MCT2	1942	MCT2	L	I	R2	CAN	12.33333333
2011	20111942MCT2	1942	MCT2	L	I	R3	CAN	8.333333333
2011	20111942MCT2	1942	MCT2	L	I	R4	CAN	9.916666667
2011	20111942MCT2	1942	MCT2	L	I	R5	CAN	3.583333333
2011	20111942UNT1	1942	UNT1	L	I	R1	INT	7
2011	20111942UNT1	1942	UNT1	L	I	R2	INT	2.5
2011	20111942UNT1	1942	UNT1	L	I	R3	INT	2
2011	20111942UNT1	1942	UNT1	L	I	R4	INT	9
2011	20111942UNT1	1942	UNT1	L	I	R5	INT	4
2011	20111942UNT2	1942	UNT2	L	I	R1	INT	3.5
2011	20111942UNT2	1942	UNT2	L	I	R2	INT	5.5
2011	20111942UNT2	1942	UNT2	L	I	R3	INT	7.25
2011	20111942UNT2	1942	UNT2	L	I	R4	INT	3.25
2011	20111942UNT2	1942	UNT2	L	I	R5	INT	3.25
2011	20111942UNT3	1942	UNT3	L	I	R1	INT	4.75
2011	20111942UNT3	1942	UNT3	L	I	R2	INT	1.25
2011	20111942UNT3	1942	UNT3	L	I	R3	INT	4.5
2011	20111942UNT3	1942	UNT3	L	I	R4	INT	1.5
2011	20111942UNT3	1942	UNT3	L	I	R5	INT	3.25
2011	20111942UNT4	1942	UNT4	L	I	R1	EDGE	3.333333333
2011	20111942UNT4	1942	UNT4	L	I	R2	EDGE	1.5
2011	20111942UNT4	1942	UNT4	L	I	R3	EDGE	1.5
2011	20111942UNT4	1942	UNT4	L	I	R4	EDGE	3
2011	20111942UNT4	1942	UNT4	L	I	R5	EDGE	5.5
2011	20111942UNT5	1942	UNT5	L	I	R1	EDGE	0.833333333
2011	20111942UNT5	1942	UNT5	L	I	R2	EDGE	0.5
2011	20111942UNT5	1942	UNT5	L	I	R3	EDGE	0.5
2011	20111942UNT5	1942	UNT5	L	I	R4	EDGE	4.25
2011	20111942UNT5	1942	UNT5	L	I	R5	EDGE	1.25
2011	20111942UNT6	1942	UNT6	L	I	R1	EDGE	5.5
2011	20111942UNT6	1942	UNT6	L	I	R2	EDGE	0.25
2011	20111942UNT6	1942	UNT6	L	I	R3	EDGE	3
2011	20111942UNT6	1942	UNT6	L	I	R4	EDGE	0.75
2011	20111942UNT6	1942	UNT6	L	I	R5	EDGE	1.5
2011	20111942UNTA	1942	UNTA	L	I	R1	INT	NA
2011	20111942UNTA	1942	UNTA	L	I	R2	INT	NA
2011	20111942UNTA	1942	UNTA	L	I	R3	INT	4.5
2011	20111942UNTA	1942	UNTA	L	I	R4	INT	4.75
2011	20111942UNTA	1942	UNTA	L	I	R5	INT	2.25
2011	20111942UNTB	1942	UNTB	L	I	R1	INT	NA
2011	20111942UNTB	1942	UNTB	L	I	R2	INT	NA
2011	20111942UNTB	1942	UNTB	L	I	R3	INT	9.75
2011	20111942UNTB	1942	UNTB	L	I	R4	INT	10.5
2011	20111942UNTB	1942	UNTB	L	I	R5	INT	2
2011	20111942UNTC	1942	UNTC	L	I	R1	INT	NA
2011	20111942UNTC	1942	UNTC	L	I	R2	INT	NA
2011	20111942UNTC	1942	UNTC	L	I	R3	INT	12.5
2011	20111942UNTC	1942	UNTC	L	I	R4	INT	7.25
2011	20111942UNTC	1942	UNTC	L	I	R5	INT	7.5
2011	20111942UNTD	1942	UNTD	L	I	R1	EDGE	NA
2011	20111942UNTD	1942	UNTD	L	I	R2	EDGE	NA
2011	20111942UNTD	1942	UNTD	L	I	R3	EDGE	4.75
2011	20111942UNTD	1942	UNTD	L	I	R4	EDGE	3.25
2011	20111942UNTD	1942	UNTD	L	I	R5	EDGE	2
2011	20111942UNTE	1942	UNTE	L	I	R1	EDGE	NA
2011	20111942UNTE	1942	UNTE	L	I	R2	EDGE	NA
2011	20111942UNTE	1942	UNTE	L	I	R3	EDGE	3
2011	20111942UNTE	1942	UNTE	L	I	R4	EDGE	2.75
2011	20111942UNTE	1942	UNTE	L	I	R5	EDGE	0.75
2011	20111942UNTF	1942	UNTF	L	I	R1	EDGE	NA
2011	20111942UNTF	1942	UNTF	L	I	R2	EDGE	NA
2011	20111942UNTF	1942	UNTF	L	I	R3	EDGE	0.75
2011	20111942UNTF	1942	UNTF	L	I	R4	EDGE	1.75
2011	20111942UNTF	1942	UNTF	L	I	R5	EDGE	12.25
2011	20112000MCT1	2000	MCT1	L	C	R1	CAN	7.333333333
2011	20112000MCT1	2000	MCT1	L	C	R2	CAN	6.333333333
2011	20112000MCT1	2000	MCT1	L	C	R3	CAN	8.333333333
2011	20112000MCT1	2000	MCT1	L	C	R4	CAN	9.333333333
2011	20112000MCT1	2000	MCT1	L	C	R5	CAN	7.583333333
2011	20112000MCT2	2000	MCT2	L	C	R1	CAN	4.8
2011	20112000MCT2	2000	MCT2	L	C	R2	CAN	8.333333333
2011	20112000MCT2	2000	MCT2	L	C	R3	CAN	9.833333333
2011	20112000MCT2	2000	MCT2	L	C	R4	CAN	9.166666667
2011	20112000MCT2	2000	MCT2	L	C	R5	CAN	10.58333333
2011	20112000UNT1	2000	UNT1	L	C	R1	INT	7.25
2011	20112000UNT1	2000	UNT1	L	C	R2	INT	2.75
2011	20112000UNT1	2000	UNT1	L	C	R3	INT	2.5
2011	20112000UNT1	2000	UNT1	L	C	R4	INT	3.25
2011	20112000UNT1	2000	UNT1	L	C	R5	INT	5.75
2011	20112000UNT2	2000	UNT2	L	C	R1	INT	6.25
2011	20112000UNT2	2000	UNT2	L	C	R2	INT	8.75
2011	20112000UNT2	2000	UNT2	L	C	R3	INT	14.5
2011	20112000UNT2	2000	UNT2	L	C	R4	INT	3.25
2011	20112000UNT2	2000	UNT2	L	C	R5	INT	11.25
2011	20112000UNT3	2000	UNT3	L	C	R1	INT	7
2011	20112000UNT3	2000	UNT3	L	C	R2	INT	3.5
2011	20112000UNT3	2000	UNT3	L	C	R3	INT	5.5
2011	20112000UNT3	2000	UNT3	L	C	R4	INT	2
2011	20112000UNT3	2000	UNT3	L	C	R5	INT	6.25
2011	20112000UNT4	2000	UNT4	L	C	R1	EDGE	12.25
2011	20112000UNT4	2000	UNT4	L	C	R2	EDGE	4.25
2011	20112000UNT4	2000	UNT4	L	C	R3	EDGE	19.5
2011	20112000UNT4	2000	UNT4	L	C	R4	EDGE	4.25
2011	20112000UNT4	2000	UNT4	L	C	R5	EDGE	16.5
2011	20112000UNT5	2000	UNT5	L	C	R1	EDGE	7.5
2011	20112000UNT5	2000	UNT5	L	C	R2	EDGE	11
2011	20112000UNT5	2000	UNT5	L	C	R3	EDGE	13.75
2011	20112000UNT5	2000	UNT5	L	C	R4	EDGE	9.25
2011	20112000UNT5	2000	UNT5	L	C	R5	EDGE	13.5
2011	20112000UNT6	2000	UNT6	L	C	R1	EDGE	10.5
2011	20112000UNT6	2000	UNT6	L	C	R2	EDGE	6.25
2011	20112000UNT6	2000	UNT6	L	C	R3	EDGE	23.5
2011	20112000UNT6	2000	UNT6	L	C	R4	EDGE	22.25
2011	20112000UNT6	2000	UNT6	L	C	R5	EDGE	25.5
2011	20112000UNTA	2000	UNTA	L	C	R1	INT	NA
2011	20112000UNTA	2000	UNTA	L	C	R2	INT	NA
2011	20112000UNTA	2000	UNTA	L	C	R3	INT	9.25
2011	20112000UNTA	2000	UNTA	L	C	R4	INT	22.25
2011	20112000UNTA	2000	UNTA	L	C	R5	INT	26.25
2011	20112000UNTB	2000	UNTB	L	C	R1	INT	NA
2011	20112000UNTB	2000	UNTB	L	C	R2	INT	NA
2011	20112000UNTB	2000	UNTB	L	C	R3	INT	17.25
2011	20112000UNTB	2000	UNTB	L	C	R4	INT	3.5
2011	20112000UNTB	2000	UNTB	L	C	R5	INT	10.5
2011	20112000UNTC	2000	UNTC	L	C	R1	INT	NA
2011	20112000UNTC	2000	UNTC	L	C	R2	INT	NA
2011	20112000UNTC	2000	UNTC	L	C	R3	INT	4.5
2011	20112000UNTC	2000	UNTC	L	C	R4	INT	1
2011	20112000UNTC	2000	UNTC	L	C	R5	INT	1.25
2011	20112000UNTD	2000	UNTD	L	C	R1	EDGE	NA
2011	20112000UNTD	2000	UNTD	L	C	R2	EDGE	NA
2011	20112000UNTD	2000	UNTD	L	C	R3	EDGE	4.25
2011	20112000UNTD	2000	UNTD	L	C	R4	EDGE	3.25
2011	20112000UNTD	2000	UNTD	L	C	R5	EDGE	11.5
2011	20112000UNTE	2000	UNTE	L	C	R1	EDGE	NA
2011	20112000UNTE	2000	UNTE	L	C	R2	EDGE	NA
2011	20112000UNTE	2000	UNTE	L	C	R3	EDGE	14.5
2011	20112000UNTE	2000	UNTE	L	C	R4	EDGE	20
2011	20112000UNTE	2000	UNTE	L	C	R5	EDGE	11.25
2011	20112000UNTF	2000	UNTF	L	C	R1	EDGE	NA
2011	20112000UNTF	2000	UNTF	L	C	R2	EDGE	NA
2011	20112000UNTF	2000	UNTF	L	C	R3	EDGE	0.25
2011	20112000UNTF	2000	UNTF	L	C	R4	EDGE	1.25
2011	20112000UNTF	2000	UNTF	L	C	R5	EDGE	0.25
2011	20112047MCT1	2047	MCT1	L	I	R1	CAN	0.775862069
2011	20112047MCT1	2047	MCT1	L	I	R2	CAN	3
2011	20112047MCT1	2047	MCT1	L	I	R3	CAN	0.583333333
2011	20112047MCT1	2047	MCT1	L	I	R4	CAN	2.833333333
2011	20112047MCT1	2047	MCT1	L	I	R5	CAN	2
2011	20112047MCT2	2047	MCT2	L	I	R1	CAN	2.25
2011	20112047MCT2	2047	MCT2	L	I	R2	CAN	2.666666667
2011	20112047MCT2	2047	MCT2	L	I	R3	CAN	0.916666667
2011	20112047MCT2	2047	MCT2	L	I	R4	CAN	2
2011	20112047MCT2	2047	MCT2	L	I	R5	CAN	6.25
2011	20112047UNT1	2047	UNT1	L	I	R1	INT	2
2011	20112047UNT1	2047	UNT1	L	I	R2	INT	9.25
2011	20112047UNT1	2047	UNT1	L	I	R3	INT	6
2011	20112047UNT1	2047	UNT1	L	I	R4	INT	1
2011	20112047UNT1	2047	UNT1	L	I	R5	INT	4.75
2011	20112047UNT2	2047	UNT2	L	I	R1	INT	0
2011	20112047UNT2	2047	UNT2	L	I	R2	INT	1.25
2011	20112047UNT2	2047	UNT2	L	I	R3	INT	7.25
2011	20112047UNT2	2047	UNT2	L	I	R4	INT	3.5
2011	20112047UNT2	2047	UNT2	L	I	R5	INT	3
2011	20112047UNT3	2047	UNT3	L	I	R1	INT	4.5
2011	20112047UNT3	2047	UNT3	L	I	R2	INT	2
2011	20112047UNT3	2047	UNT3	L	I	R3	INT	2.5
2011	20112047UNT3	2047	UNT3	L	I	R4	INT	4
2011	20112047UNT3	2047	UNT3	L	I	R5	INT	2.75
2011	20112047UNT4	2047	UNT4	L	I	R1	EDGE	2.25
2011	20112047UNT4	2047	UNT4	L	I	R2	EDGE	5.5
2011	20112047UNT4	2047	UNT4	L	I	R3	EDGE	6.75
2011	20112047UNT4	2047	UNT4	L	I	R4	EDGE	14.25
2011	20112047UNT4	2047	UNT4	L	I	R5	EDGE	6
2011	20112047UNT5	2047	UNT5	L	I	R1	EDGE	14.25
2011	20112047UNT5	2047	UNT5	L	I	R2	EDGE	7.75
2011	20112047UNT5	2047	UNT5	L	I	R3	EDGE	9
2011	20112047UNT5	2047	UNT5	L	I	R4	EDGE	12
2011	20112047UNT5	2047	UNT5	L	I	R5	EDGE	18
2011	20112047UNT6	2047	UNT6	L	I	R1	EDGE	3
2011	20112047UNT6	2047	UNT6	L	I	R2	EDGE	2
2011	20112047UNT6	2047	UNT6	L	I	R3	EDGE	4
2011	20112047UNT6	2047	UNT6	L	I	R4	EDGE	3
2011	20112047UNT6	2047	UNT6	L	I	R5	EDGE	6.75
2011	20112047UNTA	2047	UNTA	L	I	R1	INT	NA
2011	20112047UNTA	2047	UNTA	L	I	R2	INT	NA
2011	20112047UNTA	2047	UNTA	L	I	R3	INT	4.5
2011	20112047UNTA	2047	UNTA	L	I	R4	INT	3
2011	20112047UNTA	2047	UNTA	L	I	R5	INT	0.5
2011	20112047UNTB	2047	UNTB	L	I	R1	INT	NA
2011	20112047UNTB	2047	UNTB	L	I	R2	INT	NA
2011	20112047UNTB	2047	UNTB	L	I	R3	INT	0.5
2011	20112047UNTB	2047	UNTB	L	I	R4	INT	2.75
2011	20112047UNTB	2047	UNTB	L	I	R5	INT	4.75
2011	20112047UNTC	2047	UNTC	L	I	R1	INT	NA
2011	20112047UNTC	2047	UNTC	L	I	R2	INT	NA
2011	20112047UNTC	2047	UNTC	L	I	R3	INT	11.25
2011	20112047UNTC	2047	UNTC	L	I	R4	INT	2.25
2011	20112047UNTC	2047	UNTC	L	I	R5	INT	2.5
2011	20112047UNTD	2047	UNTD	L	I	R1	EDGE	NA
2011	20112047UNTD	2047	UNTD	L	I	R2	EDGE	NA
2011	20112047UNTD	2047	UNTD	L	I	R3	EDGE	33.75
2011	20112047UNTD	2047	UNTD	L	I	R4	EDGE	31.25
2011	20112047UNTD	2047	UNTD	L	I	R5	EDGE	37.75
2011	20112047UNTE	2047	UNTE	L	I	R1	EDGE	NA
2011	20112047UNTE	2047	UNTE	L	I	R2	EDGE	NA
2011	20112047UNTE	2047	UNTE	L	I	R3	EDGE	10.75
2011	20112047UNTE	2047	UNTE	L	I	R4	EDGE	3.75
2011	20112047UNTE	2047	UNTE	L	I	R5	EDGE	2.25
2011	20112047UNTF	2047	UNTF	L	I	R1	EDGE	NA
2011	20112047UNTF	2047	UNTF	L	I	R2	EDGE	NA
2011	20112047UNTF	2047	UNTF	L	I	R3	EDGE	6
2011	20112047UNTF	2047	UNTF	L	I	R4	EDGE	7
2011	20112047UNTF	2047	UNTF	L	I	R5	EDGE	8
2011	20112056MCT1	2056	MCT1	S	C	R1	CAN	5.25
2011	20112056MCT1	2056	MCT1	S	C	R2	CAN	6.333333333
2011	20112056MCT1	2056	MCT1	S	C	R3	CAN	4.5
2011	20112056MCT1	2056	MCT1	S	C	R4	CAN	1.583333333
2011	20112056MCT1	2056	MCT1	S	C	R5	CAN	7.083333333
2011	20112056MCT2	2056	MCT2	S	C	R1	CAN	14.5
2011	20112056MCT2	2056	MCT2	S	C	R2	CAN	17.4137931
2011	20112056MCT2	2056	MCT2	S	C	R3	CAN	6.583333333
2011	20112056MCT2	2056	MCT2	S	C	R4	CAN	9.333333333
2011	20112056MCT2	2056	MCT2	S	C	R5	CAN	15.41666667
2011	20112056UNT1	2056	UNT1	S	C	R1	INT	4.5
2011	20112056UNT1	2056	UNT1	S	C	R2	INT	3.25
2011	20112056UNT1	2056	UNT1	S	C	R3	INT	17.25
2011	20112056UNT1	2056	UNT1	S	C	R4	INT	14.25
2011	20112056UNT1	2056	UNT1	S	C	R5	INT	6.25
2011	20112056UNT2	2056	UNT2	S	C	R1	INT	7.5
2011	20112056UNT2	2056	UNT2	S	C	R2	INT	1.75
2011	20112056UNT2	2056	UNT2	S	C	R3	INT	6.5
2011	20112056UNT2	2056	UNT2	S	C	R4	INT	7.25
2011	20112056UNT2	2056	UNT2	S	C	R5	INT	4.75
2011	20112056UNT3	2056	UNT3	S	C	R1	INT	6
2011	20112056UNT3	2056	UNT3	S	C	R2	INT	5.75
2011	20112056UNT3	2056	UNT3	S	C	R3	INT	6.75
2011	20112056UNT3	2056	UNT3	S	C	R4	INT	25.5
2011	20112056UNT3	2056	UNT3	S	C	R5	INT	14
2011	20112056UNT4	2056	UNT4	S	C	R1	EDGE	10.25
2011	20112056UNT4	2056	UNT4	S	C	R2	EDGE	1.75
2011	20112056UNT4	2056	UNT4	S	C	R3	EDGE	9.75
2011	20112056UNT4	2056	UNT4	S	C	R4	EDGE	11
2011	20112056UNT4	2056	UNT4	S	C	R5	EDGE	24
2011	20112056UNT5	2056	UNT5	S	C	R1	EDGE	5.75
2011	20112056UNT5	2056	UNT5	S	C	R2	EDGE	7.5
2011	20112056UNT5	2056	UNT5	S	C	R3	EDGE	8
2011	20112056UNT5	2056	UNT5	S	C	R4	EDGE	3.75
2011	20112056UNT5	2056	UNT5	S	C	R5	EDGE	23
2011	20112056UNT6	2056	UNT6	S	C	R1	EDGE	10.25
2011	20112056UNT6	2056	UNT6	S	C	R2	EDGE	2.5
2011	20112056UNT6	2056	UNT6	S	C	R3	EDGE	8.5
2011	20112056UNT6	2056	UNT6	S	C	R4	EDGE	6.5
2011	20112056UNT6	2056	UNT6	S	C	R5	EDGE	16
2011	20112056UNTA	2056	UNTA	S	C	R1	INT	NA
2011	20112056UNTA	2056	UNTA	S	C	R2	INT	NA
2011	20112056UNTA	2056	UNTA	S	C	R3	INT	6.25
2011	20112056UNTA	2056	UNTA	S	C	R4	INT	6.75
2011	20112056UNTA	2056	UNTA	S	C	R5	INT	9.25
2011	20112056UNTB	2056	UNTB	S	C	R1	INT	NA
2011	20112056UNTB	2056	UNTB	S	C	R2	INT	NA
2011	20112056UNTB	2056	UNTB	S	C	R3	INT	11.25
2011	20112056UNTB	2056	UNTB	S	C	R4	INT	13.5
2011	20112056UNTB	2056	UNTB	S	C	R5	INT	20
2011	20112056UNTC	2056	UNTC	S	C	R1	INT	NA
2011	20112056UNTC	2056	UNTC	S	C	R2	INT	NA
2011	20112056UNTC	2056	UNTC	S	C	R3	INT	13.25
2011	20112056UNTC	2056	UNTC	S	C	R4	INT	20.75
2011	20112056UNTC	2056	UNTC	S	C	R5	INT	21.5
2011	20112056UNTD	2056	UNTD	S	C	R1	EDGE	NA
2011	20112056UNTD	2056	UNTD	S	C	R2	EDGE	NA
2011	20112056UNTD	2056	UNTD	S	C	R3	EDGE	11.5
2011	20112056UNTD	2056	UNTD	S	C	R4	EDGE	8.25
2011	20112056UNTD	2056	UNTD	S	C	R5	EDGE	4.25
2011	20112056UNTE	2056	UNTE	S	C	R1	EDGE	NA
2011	20112056UNTE	2056	UNTE	S	C	R2	EDGE	NA
2011	20112056UNTE	2056	UNTE	S	C	R3	EDGE	5.5
2011	20112056UNTE	2056	UNTE	S	C	R4	EDGE	1
2011	20112056UNTE	2056	UNTE	S	C	R5	EDGE	10
2011	20112056UNTF	2056	UNTF	S	C	R1	EDGE	NA
2011	20112056UNTF	2056	UNTF	S	C	R2	EDGE	NA
2011	20112056UNTF	2056	UNTF	S	C	R3	EDGE	9.5
2011	20112056UNTF	2056	UNTF	S	C	R4	EDGE	17.25
2011	20112056UNTF	2056	UNTF	S	C	R5	EDGE	35.75
2011	20112218MCT1	2218	MCT1	L	I	R1	CAN	NA
2011	20112218MCT1	2218	MCT1	L	I	R2	CAN	4.333333333
2011	20112218MCT1	2218	MCT1	L	I	R3	CAN	9.916666667
2011	20112218MCT1	2218	MCT1	L	I	R4	CAN	7.833333333
2011	20112218MCT1	2218	MCT1	L	I	R5	CAN	14.16666667
2011	20112218MCT2	2218	MCT2	L	I	R1	CAN	7.833333333
2011	20112218MCT2	2218	MCT2	L	I	R2	CAN	8
2011	20112218MCT2	2218	MCT2	L	I	R3	CAN	7.583333333
2011	20112218MCT2	2218	MCT2	L	I	R4	CAN	12.91666667
2011	20112218MCT2	2218	MCT2	L	I	R5	CAN	15.75
2011	20112218UNT1	2218	UNT1	L	I	R1	INT	2.25
2011	20112218UNT1	2218	UNT1	L	I	R2	INT	2.5
2011	20112218UNT1	2218	UNT1	L	I	R3	INT	3.75
2011	20112218UNT1	2218	UNT1	L	I	R4	INT	0.75
2011	20112218UNT1	2218	UNT1	L	I	R5	INT	3.75
2011	20112218UNT2	2218	UNT2	L	I	R1	INT	1.25
2011	20112218UNT2	2218	UNT2	L	I	R2	INT	2.75
2011	20112218UNT2	2218	UNT2	L	I	R3	INT	8.25
2011	20112218UNT2	2218	UNT2	L	I	R4	INT	4.5
2011	20112218UNT2	2218	UNT2	L	I	R5	INT	8.5
2011	20112218UNT3	2218	UNT3	L	I	R1	INT	6
2011	20112218UNT3	2218	UNT3	L	I	R2	INT	7
2011	20112218UNT3	2218	UNT3	L	I	R3	INT	20.75
2011	20112218UNT3	2218	UNT3	L	I	R4	INT	5.75
2011	20112218UNT3	2218	UNT3	L	I	R5	INT	2
2011	20112218UNT4	2218	UNT4	L	I	R1	EDGE	7
2011	20112218UNT4	2218	UNT4	L	I	R2	EDGE	1.75
2011	20112218UNT4	2218	UNT4	L	I	R3	EDGE	5.5
2011	20112218UNT4	2218	UNT4	L	I	R4	EDGE	2.75
2011	20112218UNT4	2218	UNT4	L	I	R5	EDGE	5
2011	20112218UNT5	2218	UNT5	L	I	R1	EDGE	9.75
2011	20112218UNT5	2218	UNT5	L	I	R2	EDGE	18
2011	20112218UNT5	2218	UNT5	L	I	R3	EDGE	11.25
2011	20112218UNT5	2218	UNT5	L	I	R4	EDGE	15.25
2011	20112218UNT5	2218	UNT5	L	I	R5	EDGE	18.5
2011	20112218UNT6	2218	UNT6	L	I	R1	EDGE	6.25
2011	20112218UNT6	2218	UNT6	L	I	R2	EDGE	14
2011	20112218UNT6	2218	UNT6	L	I	R3	EDGE	14.25
2011	20112218UNT6	2218	UNT6	L	I	R4	EDGE	4.75
2011	20112218UNT6	2218	UNT6	L	I	R5	EDGE	5
2011	20112218UNTA	2218	UNTA	L	I	R1	INT	NA
2011	20112218UNTA	2218	UNTA	L	I	R2	INT	NA
2011	20112218UNTA	2218	UNTA	L	I	R3	INT	6.75
2011	20112218UNTA	2218	UNTA	L	I	R4	INT	0.5
2011	20112218UNTA	2218	UNTA	L	I	R5	INT	2.5
2011	20112218UNTB	2218	UNTB	L	I	R1	INT	NA
2011	20112218UNTB	2218	UNTB	L	I	R2	INT	NA
2011	20112218UNTB	2218	UNTB	L	I	R3	INT	1.75
2011	20112218UNTB	2218	UNTB	L	I	R4	INT	3
2011	20112218UNTB	2218	UNTB	L	I	R5	INT	1.5
2011	20112218UNTC	2218	UNTC	L	I	R1	INT	NA
2011	20112218UNTC	2218	UNTC	L	I	R2	INT	NA
2011	20112218UNTC	2218	UNTC	L	I	R3	INT	18.25
2011	20112218UNTC	2218	UNTC	L	I	R4	INT	8.25
2011	20112218UNTC	2218	UNTC	L	I	R5	INT	5.5
2011	20112218UNTD	2218	UNTD	L	I	R1	EDGE	NA
2011	20112218UNTD	2218	UNTD	L	I	R2	EDGE	NA
2011	20112218UNTD	2218	UNTD	L	I	R3	EDGE	18
2011	20112218UNTD	2218	UNTD	L	I	R4	EDGE	28.25
2011	20112218UNTD	2218	UNTD	L	I	R5	EDGE	35.25
2011	20112218UNTE	2218	UNTE	L	I	R1	EDGE	NA
2011	20112218UNTE	2218	UNTE	L	I	R2	EDGE	NA
2011	20112218UNTE	2218	UNTE	L	I	R3	EDGE	4
2011	20112218UNTE	2218	UNTE	L	I	R4	EDGE	8.75
2011	20112218UNTE	2218	UNTE	L	I	R5	EDGE	2.25
2011	20112218UNTF	2218	UNTF	L	I	R1	EDGE	NA
2011	20112218UNTF	2218	UNTF	L	I	R2	EDGE	NA
2011	20112218UNTF	2218	UNTF	L	I	R3	EDGE	1.5
2011	20112218UNTF	2218	UNTF	L	I	R4	EDGE	10.75
2011	20112218UNTF	2218	UNTF	L	I	R5	EDGE	9.5
2011	20112241MCT1	2241	MCT1	L	C	R1	CAN	0.517241379
2011	20112241MCT1	2241	MCT1	L	C	R2	CAN	2.666666667
2011	20112241MCT1	2241	MCT1	L	C	R3	CAN	3.833333333
2011	20112241MCT1	2241	MCT1	L	C	R4	CAN	6.166666667
2011	20112241MCT1	2241	MCT1	L	C	R5	CAN	3.333333333
2011	20112241MCT2	2241	MCT2	L	C	R1	CAN	3.75
2011	20112241MCT2	2241	MCT2	L	C	R2	CAN	4.5
2011	20112241MCT2	2241	MCT2	L	C	R3	CAN	14.5
2011	20112241MCT2	2241	MCT2	L	C	R4	CAN	6.166666667
2011	20112241MCT2	2241	MCT2	L	C	R5	CAN	9.083333333
2011	20112241UNT1	2241	UNT1	L	C	R1	INT	9.5
2011	20112241UNT1	2241	UNT1	L	C	R2	INT	8.75
2011	20112241UNT1	2241	UNT1	L	C	R3	INT	10.5
2011	20112241UNT1	2241	UNT1	L	C	R4	INT	7.5
2011	20112241UNT1	2241	UNT1	L	C	R5	INT	20.25
2011	20112241UNT2	2241	UNT2	L	C	R1	INT	7.75
2011	20112241UNT2	2241	UNT2	L	C	R2	INT	10.55555556
2011	20112241UNT2	2241	UNT2	L	C	R3	INT	18
2011	20112241UNT2	2241	UNT2	L	C	R4	INT	6.75
2011	20112241UNT2	2241	UNT2	L	C	R5	INT	15.25
2011	20112241UNT3	2241	UNT3	L	C	R1	INT	7.5
2011	20112241UNT3	2241	UNT3	L	C	R2	INT	13
2011	20112241UNT3	2241	UNT3	L	C	R3	INT	7.5
2011	20112241UNT3	2241	UNT3	L	C	R4	INT	12
2011	20112241UNT3	2241	UNT3	L	C	R5	INT	15.5
2011	20112241UNT4	2241	UNT4	L	C	R1	EDGE	1.25
2011	20112241UNT4	2241	UNT4	L	C	R2	EDGE	1.75
2011	20112241UNT4	2241	UNT4	L	C	R3	EDGE	7.25
2011	20112241UNT4	2241	UNT4	L	C	R4	EDGE	3
2011	20112241UNT4	2241	UNT4	L	C	R5	EDGE	1.75
2011	20112241UNT5	2241	UNT5	L	C	R1	EDGE	7.75
2011	20112241UNT5	2241	UNT5	L	C	R2	EDGE	2.5
2011	20112241UNT5	2241	UNT5	L	C	R3	EDGE	8
2011	20112241UNT5	2241	UNT5	L	C	R4	EDGE	10.25
2011	20112241UNT5	2241	UNT5	L	C	R5	EDGE	16
2011	20112241UNT6	2241	UNT6	L	C	R1	EDGE	1
2011	20112241UNT6	2241	UNT6	L	C	R2	EDGE	7
2011	20112241UNT6	2241	UNT6	L	C	R3	EDGE	7
2011	20112241UNT6	2241	UNT6	L	C	R4	EDGE	4.25
2011	20112241UNT6	2241	UNT6	L	C	R5	EDGE	13.5
2011	20112241UNTA	2241	UNTA	L	C	R1	INT	NA
2011	20112241UNTA	2241	UNTA	L	C	R2	INT	NA
2011	20112241UNTA	2241	UNTA	L	C	R3	INT	9.75
2011	20112241UNTA	2241	UNTA	L	C	R4	INT	5.75
2011	20112241UNTA	2241	UNTA	L	C	R5	INT	7.75
2011	20112241UNTB	2241	UNTB	L	C	R1	INT	NA
2011	20112241UNTB	2241	UNTB	L	C	R2	INT	NA
2011	20112241UNTB	2241	UNTB	L	C	R3	INT	7.25
2011	20112241UNTB	2241	UNTB	L	C	R4	INT	11.5
2011	20112241UNTB	2241	UNTB	L	C	R5	INT	16.5
2011	20112241UNTC	2241	UNTC	L	C	R1	INT	NA
2011	20112241UNTC	2241	UNTC	L	C	R2	INT	NA
2011	20112241UNTC	2241	UNTC	L	C	R3	INT	11.5
2011	20112241UNTC	2241	UNTC	L	C	R4	INT	19.5
2011	20112241UNTC	2241	UNTC	L	C	R5	INT	18.75
2011	20112241UNTD	2241	UNTD	L	C	R1	EDGE	NA
2011	20112241UNTD	2241	UNTD	L	C	R2	EDGE	NA
2011	20112241UNTD	2241	UNTD	L	C	R3	EDGE	1.5
2011	20112241UNTD	2241	UNTD	L	C	R4	EDGE	6
2011	20112241UNTD	2241	UNTD	L	C	R5	EDGE	9.75
2011	20112241UNTE	2241	UNTE	L	C	R1	EDGE	NA
2011	20112241UNTE	2241	UNTE	L	C	R2	EDGE	NA
2011	20112241UNTE	2241	UNTE	L	C	R3	EDGE	0.25
2011	20112241UNTE	2241	UNTE	L	C	R4	EDGE	4.75
2011	20112241UNTE	2241	UNTE	L	C	R5	EDGE	3
2011	20112241UNTF	2241	UNTF	L	C	R1	EDGE	NA
2011	20112241UNTF	2241	UNTF	L	C	R2	EDGE	NA
2011	20112241UNTF	2241	UNTF	L	C	R3	EDGE	4.25
2011	20112241UNTF	2241	UNTF	L	C	R4	EDGE	4
2011	20112241UNTF	2241	UNTF	L	C	R5	EDGE	2.75
2012	20121023MCT1	1023	MCT1	S	I	R1	CAN	1.896551724
2012	20121023MCT1	1023	MCT1	S	I	R2	CAN	0.666666667
2012	20121023MCT1	1023	MCT1	S	I	R3	CAN	1.333333333
2012	20121023MCT1	1023	MCT1	S	I	R4	CAN	0.833333333
2012	20121023MCT1	1023	MCT1	S	I	R5	CAN	2.583333333
2012	20121023MCT2	1023	MCT2	S	I	R1	CAN	4.464285714
2012	20121023MCT2	1023	MCT2	S	I	R2	CAN	3
2012	20121023MCT2	1023	MCT2	S	I	R3	CAN	1.916666667
2012	20121023MCT2	1023	MCT2	S	I	R4	CAN	3.916666667
2012	20121023MCT2	1023	MCT2	S	I	R5	CAN	3.416666667
2012	20121023UNT1	1023	UNT1	S	I	R1	INT	11
2012	20121023UNT1	1023	UNT1	S	I	R2	INT	6.75
2012	20121023UNT1	1023	UNT1	S	I	R3	INT	5.5
2012	20121023UNT1	1023	UNT1	S	I	R4	INT	11.5
2012	20121023UNT1	1023	UNT1	S	I	R5	INT	12.25
2012	20121023UNT2	1023	UNT2	S	I	R1	INT	12.75
2012	20121023UNT2	1023	UNT2	S	I	R2	INT	20.25
2012	20121023UNT2	1023	UNT2	S	I	R3	INT	12.75
2012	20121023UNT2	1023	UNT2	S	I	R4	INT	10.75
2012	20121023UNT2	1023	UNT2	S	I	R5	INT	8.25
2012	20121023UNT3	1023	UNT3	S	I	R1	INT	13.5
2012	20121023UNT3	1023	UNT3	S	I	R2	INT	6.5
2012	20121023UNT3	1023	UNT3	S	I	R3	INT	17.75
2012	20121023UNT3	1023	UNT3	S	I	R4	INT	12.75
2012	20121023UNT3	1023	UNT3	S	I	R5	INT	15.25
2012	20121023UNT4	1023	UNT4	S	I	R1	INT	5.25
2012	20121023UNT4	1023	UNT4	S	I	R2	INT	10.25
2012	20121023UNT4	1023	UNT4	S	I	R3	INT	8.25
2012	20121023UNT4	1023	UNT4	S	I	R4	INT	3
2012	20121023UNT4	1023	UNT4	S	I	R5	INT	4.75
2012	20121023UNT5	1023	UNT5	S	I	R1	INT	7.25
2012	20121023UNT5	1023	UNT5	S	I	R2	INT	5
2012	20121023UNT5	1023	UNT5	S	I	R3	INT	7
2012	20121023UNT5	1023	UNT5	S	I	R4	INT	6.5
2012	20121023UNT5	1023	UNT5	S	I	R5	INT	4.5
2012	20121023UNT6	1023	UNT6	S	I	R1	INT	6
2012	20121023UNT6	1023	UNT6	S	I	R2	INT	5.5
2012	20121023UNT6	1023	UNT6	S	I	R3	INT	2.25
2012	20121023UNT6	1023	UNT6	S	I	R4	INT	9.5
2012	20121023UNT6	1023	UNT6	S	I	R5	INT	7.25
2012	20121023UNTA	1023	UNTA	S	I	R1	EDGE	7.75
2012	20121023UNTA	1023	UNTA	S	I	R2	EDGE	3.75
2012	20121023UNTA	1023	UNTA	S	I	R3	EDGE	21
2012	20121023UNTA	1023	UNTA	S	I	R4	EDGE	10
2012	20121023UNTA	1023	UNTA	S	I	R5	EDGE	12.25
2012	20121023UNTB	1023	UNTB	S	I	R1	EDGE	0.75
2012	20121023UNTB	1023	UNTB	S	I	R2	EDGE	2.75
2012	20121023UNTB	1023	UNTB	S	I	R3	EDGE	1.5
2012	20121023UNTB	1023	UNTB	S	I	R4	EDGE	7
2012	20121023UNTB	1023	UNTB	S	I	R5	EDGE	7.75
2012	20121023UNTC	1023	UNTC	S	I	R1	EDGE	3
2012	20121023UNTC	1023	UNTC	S	I	R2	EDGE	2
2012	20121023UNTC	1023	UNTC	S	I	R3	EDGE	4.75
2012	20121023UNTC	1023	UNTC	S	I	R4	EDGE	16.75
2012	20121023UNTC	1023	UNTC	S	I	R5	EDGE	6
2012	20121023UNTD	1023	UNTD	S	I	R1	EDGE	10.25
2012	20121023UNTD	1023	UNTD	S	I	R2	EDGE	13
2012	20121023UNTD	1023	UNTD	S	I	R3	EDGE	16.75
2012	20121023UNTD	1023	UNTD	S	I	R4	EDGE	12.5
2012	20121023UNTD	1023	UNTD	S	I	R5	EDGE	12.25
2012	20121023UNTE	1023	UNTE	S	I	R1	EDGE	7.75
2012	20121023UNTE	1023	UNTE	S	I	R2	EDGE	12
2012	20121023UNTE	1023	UNTE	S	I	R3	EDGE	31
2012	20121023UNTE	1023	UNTE	S	I	R4	EDGE	7.25
2012	20121023UNTE	1023	UNTE	S	I	R5	EDGE	6.5
2012	20121023UNTF	1023	UNTF	S	I	R1	EDGE	25.25
2012	20121023UNTF	1023	UNTF	S	I	R2	EDGE	16
2012	20121023UNTF	1023	UNTF	S	I	R3	EDGE	7.5
2012	20121023UNTF	1023	UNTF	S	I	R4	EDGE	22.75
2012	20121023UNTF	1023	UNTF	S	I	R5	EDGE	6.75
2012	20121058MCT1	1058	MCT1	S	I	R1	CAN	1.166666667
2012	20121058MCT1	1058	MCT1	S	I	R2	CAN	2.142857143
2012	20121058MCT1	1058	MCT1	S	I	R3	CAN	3.583333333
2012	20121058MCT1	1058	MCT1	S	I	R4	CAN	7.416666667
2012	20121058MCT1	1058	MCT1	S	I	R5	CAN	3.416666667
2012	20121058MCT2	1058	MCT2	S	I	R1	CAN	2.833333333
2012	20121058MCT2	1058	MCT2	S	I	R2	CAN	0.961538462
2012	20121058MCT2	1058	MCT2	S	I	R3	CAN	3.416666667
2012	20121058MCT2	1058	MCT2	S	I	R4	CAN	5.25
2012	20121058MCT2	1058	MCT2	S	I	R5	CAN	7.916666667
2012	20121058UNT1	1058	UNT1	S	I	R1	INT	2.75
2012	20121058UNT1	1058	UNT1	S	I	R2	INT	7
2012	20121058UNT1	1058	UNT1	S	I	R3	INT	2.5
2012	20121058UNT1	1058	UNT1	S	I	R4	INT	9.5
2012	20121058UNT1	1058	UNT1	S	I	R5	INT	11.5
2012	20121058UNT2	1058	UNT2	S	I	R1	INT	0.75
2012	20121058UNT2	1058	UNT2	S	I	R2	INT	2.75
2012	20121058UNT2	1058	UNT2	S	I	R3	INT	2.75
2012	20121058UNT2	1058	UNT2	S	I	R4	INT	1.5
2012	20121058UNT2	1058	UNT2	S	I	R5	INT	1.75
2012	20121058UNT3	1058	UNT3	S	I	R1	INT	4
2012	20121058UNT3	1058	UNT3	S	I	R2	INT	4.5
2012	20121058UNT3	1058	UNT3	S	I	R3	INT	6.5
2012	20121058UNT3	1058	UNT3	S	I	R4	INT	12
2012	20121058UNT3	1058	UNT3	S	I	R5	INT	10.25
2012	20121058UNT4	1058	UNT4	S	I	R1	INT	5.5
2012	20121058UNT4	1058	UNT4	S	I	R2	INT	6.5
2012	20121058UNT4	1058	UNT4	S	I	R3	INT	10
2012	20121058UNT4	1058	UNT4	S	I	R4	INT	3.5
2012	20121058UNT4	1058	UNT4	S	I	R5	INT	2.75
2012	20121058UNT5	1058	UNT5	S	I	R1	INT	4
2012	20121058UNT5	1058	UNT5	S	I	R2	INT	6.75
2012	20121058UNT5	1058	UNT5	S	I	R3	INT	1
2012	20121058UNT5	1058	UNT5	S	I	R4	INT	7
2012	20121058UNT5	1058	UNT5	S	I	R5	INT	7.75
2012	20121058UNT6	1058	UNT6	S	I	R1	INT	3
2012	20121058UNT6	1058	UNT6	S	I	R2	INT	1
2012	20121058UNT6	1058	UNT6	S	I	R3	INT	2.25
2012	20121058UNT6	1058	UNT6	S	I	R4	INT	4.5
2012	20121058UNT6	1058	UNT6	S	I	R5	INT	6
2012	20121058UNTA	1058	UNTA	S	I	R1	EDGE	2.5
2012	20121058UNTA	1058	UNTA	S	I	R2	EDGE	5.25
2012	20121058UNTA	1058	UNTA	S	I	R3	EDGE	5
2012	20121058UNTA	1058	UNTA	S	I	R4	EDGE	4.5
2012	20121058UNTA	1058	UNTA	S	I	R5	EDGE	12.5
2012	20121058UNTB	1058	UNTB	S	I	R1	EDGE	6.25
2012	20121058UNTB	1058	UNTB	S	I	R2	EDGE	15
2012	20121058UNTB	1058	UNTB	S	I	R3	EDGE	7.25
2012	20121058UNTB	1058	UNTB	S	I	R4	EDGE	23.75
2012	20121058UNTB	1058	UNTB	S	I	R5	EDGE	12.5
2012	20121058UNTC	1058	UNTC	S	I	R1	EDGE	0.5
2012	20121058UNTC	1058	UNTC	S	I	R2	EDGE	2
2012	20121058UNTC	1058	UNTC	S	I	R3	EDGE	3.5
2012	20121058UNTC	1058	UNTC	S	I	R4	EDGE	2.5
2012	20121058UNTC	1058	UNTC	S	I	R5	EDGE	4.75
2012	20121058UNTD	1058	UNTD	S	I	R1	EDGE	3
2012	20121058UNTD	1058	UNTD	S	I	R2	EDGE	5.5
2012	20121058UNTD	1058	UNTD	S	I	R3	EDGE	1.25
2012	20121058UNTD	1058	UNTD	S	I	R4	EDGE	3.75
2012	20121058UNTD	1058	UNTD	S	I	R5	EDGE	3
2012	20121058UNTE	1058	UNTE	S	I	R1	EDGE	3
2012	20121058UNTE	1058	UNTE	S	I	R2	EDGE	5
2012	20121058UNTE	1058	UNTE	S	I	R3	EDGE	12.25
2012	20121058UNTE	1058	UNTE	S	I	R4	EDGE	7
2012	20121058UNTE	1058	UNTE	S	I	R5	EDGE	7.75
2012	20121058UNTF	1058	UNTF	S	I	R1	EDGE	2.5
2012	20121058UNTF	1058	UNTF	S	I	R2	EDGE	1.75
2012	20121058UNTF	1058	UNTF	S	I	R3	EDGE	1.75
2012	20121058UNTF	1058	UNTF	S	I	R4	EDGE	3
2012	20121058UNTF	1058	UNTF	S	I	R5	EDGE	1.25
2012	20121078MCT1	1078	MCT1	S	C	R1	CAN	6.5
2012	20121078MCT1	1078	MCT1	S	C	R2	CAN	7.596153846
2012	20121078MCT1	1078	MCT1	S	C	R3	CAN	7.685185185
2012	20121078MCT1	1078	MCT1	S	C	R4	CAN	6.833333333
2012	20121078MCT1	1078	MCT1	S	C	R5	CAN	8.666666667
2012	20121078MCT2	1078	MCT2	S	C	R1	CAN	2.083333333
2012	20121078MCT2	1078	MCT2	S	C	R2	CAN	6.083333333
2012	20121078MCT2	1078	MCT2	S	C	R3	CAN	10.08333333
2012	20121078MCT2	1078	MCT2	S	C	R4	CAN	3.166666667
2012	20121078MCT2	1078	MCT2	S	C	R5	CAN	5.25
2012	20121078UNT1	1078	UNT1	S	C	R1	INT	6.75
2012	20121078UNT1	1078	UNT1	S	C	R2	INT	9.75
2012	20121078UNT1	1078	UNT1	S	C	R3	INT	15.25
2012	20121078UNT1	1078	UNT1	S	C	R4	INT	15
2012	20121078UNT1	1078	UNT1	S	C	R5	INT	13
2012	20121078UNT2	1078	UNT2	S	C	R1	INT	9.25
2012	20121078UNT2	1078	UNT2	S	C	R2	INT	12
2012	20121078UNT2	1078	UNT2	S	C	R3	INT	6.25
2012	20121078UNT2	1078	UNT2	S	C	R4	INT	11
2012	20121078UNT2	1078	UNT2	S	C	R5	INT	10.75
2012	20121078UNT3	1078	UNT3	S	C	R1	INT	1.5
2012	20121078UNT3	1078	UNT3	S	C	R2	INT	6.75
2012	20121078UNT3	1078	UNT3	S	C	R3	INT	2
2012	20121078UNT3	1078	UNT3	S	C	R4	INT	5.25
2012	20121078UNT3	1078	UNT3	S	C	R5	INT	1.25
2012	20121078UNT4	1078	UNT4	S	C	R1	INT	6.25
2012	20121078UNT4	1078	UNT4	S	C	R2	INT	10
2012	20121078UNT4	1078	UNT4	S	C	R3	INT	6
2012	20121078UNT4	1078	UNT4	S	C	R4	INT	5
2012	20121078UNT4	1078	UNT4	S	C	R5	INT	6.75
2012	20121078UNT5	1078	UNT5	S	C	R1	INT	6.25
2012	20121078UNT5	1078	UNT5	S	C	R2	INT	4.25
2012	20121078UNT5	1078	UNT5	S	C	R3	INT	16.5
2012	20121078UNT5	1078	UNT5	S	C	R4	INT	6.25
2012	20121078UNT5	1078	UNT5	S	C	R5	INT	9.75
2012	20121078UNT6	1078	UNT6	S	C	R1	INT	13.5
2012	20121078UNT6	1078	UNT6	S	C	R2	INT	12.75
2012	20121078UNT6	1078	UNT6	S	C	R3	INT	13.5
2012	20121078UNT6	1078	UNT6	S	C	R4	INT	22.25
2012	20121078UNT6	1078	UNT6	S	C	R5	INT	12.5
2012	20121078UNTA	1078	UNTA	S	C	R1	EDGE	7
2012	20121078UNTA	1078	UNTA	S	C	R2	EDGE	11.5
2012	20121078UNTA	1078	UNTA	S	C	R3	EDGE	18.5
2012	20121078UNTA	1078	UNTA	S	C	R4	EDGE	8
2012	20121078UNTA	1078	UNTA	S	C	R5	EDGE	19
2012	20121078UNTB	1078	UNTB	S	C	R1	EDGE	4
2012	20121078UNTB	1078	UNTB	S	C	R2	EDGE	4.25
2012	20121078UNTB	1078	UNTB	S	C	R3	EDGE	13
2012	20121078UNTB	1078	UNTB	S	C	R4	EDGE	5
2012	20121078UNTB	1078	UNTB	S	C	R5	EDGE	4
2012	20121078UNTC	1078	UNTC	S	C	R1	EDGE	6
2012	20121078UNTC	1078	UNTC	S	C	R2	EDGE	8
2012	20121078UNTC	1078	UNTC	S	C	R3	EDGE	2.5
2012	20121078UNTC	1078	UNTC	S	C	R4	EDGE	3.75
2012	20121078UNTC	1078	UNTC	S	C	R5	EDGE	3
2012	20121078UNTD	1078	UNTD	S	C	R1	EDGE	4
2012	20121078UNTD	1078	UNTD	S	C	R2	EDGE	1.25
2012	20121078UNTD	1078	UNTD	S	C	R3	EDGE	11.75
2012	20121078UNTD	1078	UNTD	S	C	R4	EDGE	1.25
2012	20121078UNTD	1078	UNTD	S	C	R5	EDGE	5
2012	20121078UNTE	1078	UNTE	S	C	R1	EDGE	0.75
2012	20121078UNTE	1078	UNTE	S	C	R2	EDGE	3
2012	20121078UNTE	1078	UNTE	S	C	R3	EDGE	0.25
2012	20121078UNTE	1078	UNTE	S	C	R4	EDGE	2.5
2012	20121078UNTE	1078	UNTE	S	C	R5	EDGE	3.25
2012	20121078UNTF	1078	UNTF	S	C	R1	EDGE	1.25
2012	20121078UNTF	1078	UNTF	S	C	R2	EDGE	0.25
2012	20121078UNTF	1078	UNTF	S	C	R3	EDGE	0.25
2012	20121078UNTF	1078	UNTF	S	C	R4	EDGE	0.5
2012	20121078UNTF	1078	UNTF	S	C	R5	EDGE	0.5
2012	20121088MCT1	1088	MCT1	S	C	R1	CAN	3.833333333
2012	20121088MCT1	1088	MCT1	S	C	R2	CAN	0.916666667
2012	20121088MCT1	1088	MCT1	S	C	R3	CAN	1.25
2012	20121088MCT1	1088	MCT1	S	C	R4	CAN	2.583333333
2012	20121088MCT1	1088	MCT1	S	C	R5	CAN	2
2012	20121088MCT2	1088	MCT2	S	C	R1	CAN	0.666666667
2012	20121088MCT2	1088	MCT2	S	C	R2	CAN	1.333333333
2012	20121088MCT2	1088	MCT2	S	C	R3	CAN	1.166666667
2012	20121088MCT2	1088	MCT2	S	C	R4	CAN	4.416666667
2012	20121088MCT2	1088	MCT2	S	C	R5	CAN	1.583333333
2012	20121088UNT1	1088	UNT1	S	C	R1	INT	1.5
2012	20121088UNT1	1088	UNT1	S	C	R2	INT	4.25
2012	20121088UNT1	1088	UNT1	S	C	R3	INT	1
2012	20121088UNT1	1088	UNT1	S	C	R4	INT	1.25
2012	20121088UNT1	1088	UNT1	S	C	R5	INT	2.75
2012	20121088UNT2	1088	UNT2	S	C	R1	INT	2.75
2012	20121088UNT2	1088	UNT2	S	C	R2	INT	0.5
2012	20121088UNT2	1088	UNT2	S	C	R3	INT	1
2012	20121088UNT2	1088	UNT2	S	C	R4	INT	1
2012	20121088UNT2	1088	UNT2	S	C	R5	INT	13.75
2012	20121088UNT3	1088	UNT3	S	C	R1	INT	4
2012	20121088UNT3	1088	UNT3	S	C	R2	INT	0.75
2012	20121088UNT3	1088	UNT3	S	C	R3	INT	1.75
2012	20121088UNT3	1088	UNT3	S	C	R4	INT	5
2012	20121088UNT3	1088	UNT3	S	C	R5	INT	2.75
2012	20121088UNT4	1088	UNT4	S	C	R1	INT	4
2012	20121088UNT4	1088	UNT4	S	C	R2	INT	0.75
2012	20121088UNT4	1088	UNT4	S	C	R3	INT	1.5
2012	20121088UNT4	1088	UNT4	S	C	R4	INT	0.5
2012	20121088UNT4	1088	UNT4	S	C	R5	INT	3
2012	20121088UNT5	1088	UNT5	S	C	R1	INT	4
2012	20121088UNT5	1088	UNT5	S	C	R2	INT	0.25
2012	20121088UNT5	1088	UNT5	S	C	R3	INT	0.5
2012	20121088UNT5	1088	UNT5	S	C	R4	INT	4.5
2012	20121088UNT5	1088	UNT5	S	C	R5	INT	2.25
2012	20121088UNT6	1088	UNT6	S	C	R1	INT	0.25
2012	20121088UNT6	1088	UNT6	S	C	R2	INT	0.75
2012	20121088UNT6	1088	UNT6	S	C	R3	INT	1.25
2012	20121088UNT6	1088	UNT6	S	C	R4	INT	1.75
2012	20121088UNT6	1088	UNT6	S	C	R5	INT	4.25
2012	20121088UNTA	1088	UNTA	S	C	R1	EDGE	4.75
2012	20121088UNTA	1088	UNTA	S	C	R2	EDGE	1.5
2012	20121088UNTA	1088	UNTA	S	C	R3	EDGE	4.75
2012	20121088UNTA	1088	UNTA	S	C	R4	EDGE	1.5
2012	20121088UNTA	1088	UNTA	S	C	R5	EDGE	2.25
2012	20121088UNTB	1088	UNTB	S	C	R1	EDGE	3
2012	20121088UNTB	1088	UNTB	S	C	R2	EDGE	0.5
2012	20121088UNTB	1088	UNTB	S	C	R3	EDGE	7.25
2012	20121088UNTB	1088	UNTB	S	C	R4	EDGE	0.75
2012	20121088UNTB	1088	UNTB	S	C	R5	EDGE	0.5
2012	20121088UNTC	1088	UNTC	S	C	R1	EDGE	0.75
2012	20121088UNTC	1088	UNTC	S	C	R2	EDGE	0.25
2012	20121088UNTC	1088	UNTC	S	C	R3	EDGE	1.5
2012	20121088UNTC	1088	UNTC	S	C	R4	EDGE	0.75
2012	20121088UNTC	1088	UNTC	S	C	R5	EDGE	1
2012	20121088UNTD	1088	UNTD	S	C	R1	EDGE	1.25
2012	20121088UNTD	1088	UNTD	S	C	R2	EDGE	1
2012	20121088UNTD	1088	UNTD	S	C	R3	EDGE	0.25
2012	20121088UNTD	1088	UNTD	S	C	R4	EDGE	0.75
2012	20121088UNTD	1088	UNTD	S	C	R5	EDGE	4.25
2012	20121088UNTE	1088	UNTE	S	C	R1	EDGE	5.25
2012	20121088UNTE	1088	UNTE	S	C	R2	EDGE	0.5
2012	20121088UNTE	1088	UNTE	S	C	R3	EDGE	1.25
2012	20121088UNTE	1088	UNTE	S	C	R4	EDGE	1.5
2012	20121088UNTE	1088	UNTE	S	C	R5	EDGE	2
2012	20121088UNTF	1088	UNTF	S	C	R1	EDGE	2
2012	20121088UNTF	1088	UNTF	S	C	R2	EDGE	0.833333333
2012	20121088UNTF	1088	UNTF	S	C	R3	EDGE	4.25
2012	20121088UNTF	1088	UNTF	S	C	R4	EDGE	1.5
2012	20121088UNTF	1088	UNTF	S	C	R5	EDGE	3.25
2012	20121433MCT1	1433	MCT1	S	C	R1	CAN	3.166666667
2012	20121433MCT1	1433	MCT1	S	C	R2	CAN	1.666666667
2012	20121433MCT1	1433	MCT1	S	C	R3	CAN	2.666666667
2012	20121433MCT1	1433	MCT1	S	C	R4	CAN	3.916666667
2012	20121433MCT1	1433	MCT1	S	C	R5	CAN	3.5
2012	20121433MCT2	1433	MCT2	S	C	R1	CAN	1.166666667
2012	20121433MCT2	1433	MCT2	S	C	R2	CAN	0.833333333
2012	20121433MCT2	1433	MCT2	S	C	R3	CAN	1.416666667
2012	20121433MCT2	1433	MCT2	S	C	R4	CAN	2.583333333
2012	20121433MCT2	1433	MCT2	S	C	R5	CAN	0
2012	20121433UNT1	1433	UNT1	S	C	R1	INT	2.75
2012	20121433UNT1	1433	UNT1	S	C	R2	INT	7
2012	20121433UNT1	1433	UNT1	S	C	R3	INT	4.75
2012	20121433UNT1	1433	UNT1	S	C	R4	INT	8.25
2012	20121433UNT1	1433	UNT1	S	C	R5	INT	3
2012	20121433UNT2	1433	UNT2	S	C	R1	INT	2.25
2012	20121433UNT2	1433	UNT2	S	C	R2	INT	2.25
2012	20121433UNT2	1433	UNT2	S	C	R3	INT	1.75
2012	20121433UNT2	1433	UNT2	S	C	R4	INT	7.5
2012	20121433UNT2	1433	UNT2	S	C	R5	INT	9
2012	20121433UNT3	1433	UNT3	S	C	R1	INT	2
2012	20121433UNT3	1433	UNT3	S	C	R2	INT	1.5
2012	20121433UNT3	1433	UNT3	S	C	R3	INT	6.25
2012	20121433UNT3	1433	UNT3	S	C	R4	INT	1.75
2012	20121433UNT3	1433	UNT3	S	C	R5	INT	2.5
2012	20121433UNT4	1433	UNT4	S	C	R1	INT	2.25
2012	20121433UNT4	1433	UNT4	S	C	R2	INT	2.75
2012	20121433UNT4	1433	UNT4	S	C	R3	INT	2
2012	20121433UNT4	1433	UNT4	S	C	R4	INT	8.75
2012	20121433UNT4	1433	UNT4	S	C	R5	INT	3
2012	20121433UNT5	1433	UNT5	S	C	R1	INT	4
2012	20121433UNT5	1433	UNT5	S	C	R2	INT	7
2012	20121433UNT5	1433	UNT5	S	C	R3	INT	10.75
2012	20121433UNT5	1433	UNT5	S	C	R4	INT	15.5
2012	20121433UNT5	1433	UNT5	S	C	R5	INT	9.25
2012	20121433UNT6	1433	UNT6	S	C	R1	INT	1.5
2012	20121433UNT6	1433	UNT6	S	C	R2	INT	1.25
2012	20121433UNT6	1433	UNT6	S	C	R3	INT	5.75
2012	20121433UNT6	1433	UNT6	S	C	R4	INT	5.25
2012	20121433UNT6	1433	UNT6	S	C	R5	INT	7
2012	20121433UNTA	1433	UNTA	S	C	R1	EDGE	1.388888889
2012	20121433UNTA	1433	UNTA	S	C	R2	EDGE	3.25
2012	20121433UNTA	1433	UNTA	S	C	R3	EDGE	3.5
2012	20121433UNTA	1433	UNTA	S	C	R4	EDGE	6.5
2012	20121433UNTA	1433	UNTA	S	C	R5	EDGE	7.25
2012	20121433UNTB	1433	UNTB	S	C	R1	EDGE	5.5
2012	20121433UNTB	1433	UNTB	S	C	R2	EDGE	9.5
2012	20121433UNTB	1433	UNTB	S	C	R3	EDGE	17.75
2012	20121433UNTB	1433	UNTB	S	C	R4	EDGE	14.5
2012	20121433UNTB	1433	UNTB	S	C	R5	EDGE	11.25
2012	20121433UNTC	1433	UNTC	S	C	R1	EDGE	8
2012	20121433UNTC	1433	UNTC	S	C	R2	EDGE	2.75
2012	20121433UNTC	1433	UNTC	S	C	R3	EDGE	13.75
2012	20121433UNTC	1433	UNTC	S	C	R4	EDGE	5.5
2012	20121433UNTC	1433	UNTC	S	C	R5	EDGE	6.25
2012	20121433UNTD	1433	UNTD	S	C	R1	EDGE	7.75
2012	20121433UNTD	1433	UNTD	S	C	R2	EDGE	2
2012	20121433UNTD	1433	UNTD	S	C	R3	EDGE	5
2012	20121433UNTD	1433	UNTD	S	C	R4	EDGE	8.25
2012	20121433UNTD	1433	UNTD	S	C	R5	EDGE	5.75
2012	20121433UNTE	1433	UNTE	S	C	R1	EDGE	4
2012	20121433UNTE	1433	UNTE	S	C	R2	EDGE	4.75
2012	20121433UNTE	1433	UNTE	S	C	R3	EDGE	4.75
2012	20121433UNTE	1433	UNTE	S	C	R4	EDGE	6.75
2012	20121433UNTE	1433	UNTE	S	C	R5	EDGE	10
2012	20121433UNTF	1433	UNTF	S	C	R1	EDGE	5.25
2012	20121433UNTF	1433	UNTF	S	C	R2	EDGE	4
2012	20121433UNTF	1433	UNTF	S	C	R3	EDGE	3.75
2012	20121433UNTF	1433	UNTF	S	C	R4	EDGE	7.75
2012	20121433UNTF	1433	UNTF	S	C	R5	EDGE	12.25
2012	20121455MCT1	1455	MCT1	L	C	R1	CAN	2.416666667
2012	20121455MCT1	1455	MCT1	L	C	R2	CAN	3.666666667
2012	20121455MCT1	1455	MCT1	L	C	R3	CAN	6.916666667
2012	20121455MCT1	1455	MCT1	L	C	R4	CAN	7.833333333
2012	20121455MCT1	1455	MCT1	L	C	R5	CAN	4.833333333
2012	20121455MCT2	1455	MCT2	L	C	R1	CAN	2.166666667
2012	20121455MCT2	1455	MCT2	L	C	R2	CAN	6.416666667
2012	20121455MCT2	1455	MCT2	L	C	R3	CAN	9.416666667
2012	20121455MCT2	1455	MCT2	L	C	R4	CAN	7.75
2012	20121455MCT2	1455	MCT2	L	C	R5	CAN	5.166666667
2012	20121455UNT1	1455	UNT1	L	C	R1	INT	5.5
2012	20121455UNT1	1455	UNT1	L	C	R2	INT	4
2012	20121455UNT1	1455	UNT1	L	C	R3	INT	3.5
2012	20121455UNT1	1455	UNT1	L	C	R4	INT	20.5
2012	20121455UNT1	1455	UNT1	L	C	R5	INT	11.75
2012	20121455UNT2	1455	UNT2	L	C	R1	INT	1.5
2012	20121455UNT2	1455	UNT2	L	C	R2	INT	3
2012	20121455UNT2	1455	UNT2	L	C	R3	INT	6.5
2012	20121455UNT2	1455	UNT2	L	C	R4	INT	10.25
2012	20121455UNT2	1455	UNT2	L	C	R5	INT	8
2012	20121455UNT3	1455	UNT3	L	C	R1	INT	0.75
2012	20121455UNT3	1455	UNT3	L	C	R2	INT	3.5
2012	20121455UNT3	1455	UNT3	L	C	R3	INT	3.5
2012	20121455UNT3	1455	UNT3	L	C	R4	INT	7.75
2012	20121455UNT3	1455	UNT3	L	C	R5	INT	4.5
2012	20121455UNT4	1455	UNT4	L	C	R1	INT	3.25
2012	20121455UNT4	1455	UNT4	L	C	R2	INT	3.25
2012	20121455UNT4	1455	UNT4	L	C	R3	INT	9.25
2012	20121455UNT4	1455	UNT4	L	C	R4	INT	10.75
2012	20121455UNT4	1455	UNT4	L	C	R5	INT	4.75
2012	20121455UNT5	1455	UNT5	L	C	R1	INT	2.5
2012	20121455UNT5	1455	UNT5	L	C	R2	INT	5.25
2012	20121455UNT5	1455	UNT5	L	C	R3	INT	8.25
2012	20121455UNT5	1455	UNT5	L	C	R4	INT	5
2012	20121455UNT5	1455	UNT5	L	C	R5	INT	6.25
2012	20121455UNT6	1455	UNT6	L	C	R1	INT	1.25
2012	20121455UNT6	1455	UNT6	L	C	R2	INT	1.25
2012	20121455UNT6	1455	UNT6	L	C	R3	INT	5.5
2012	20121455UNT6	1455	UNT6	L	C	R4	INT	4
2012	20121455UNT6	1455	UNT6	L	C	R5	INT	2
2012	20121455UNTA	1455	UNTA	L	C	R1	EDGE	3
2012	20121455UNTA	1455	UNTA	L	C	R2	EDGE	3.25
2012	20121455UNTA	1455	UNTA	L	C	R3	EDGE	1.25
2012	20121455UNTA	1455	UNTA	L	C	R4	EDGE	6.5
2012	20121455UNTA	1455	UNTA	L	C	R5	EDGE	15.75
2012	20121455UNTB	1455	UNTB	L	C	R1	EDGE	1
2012	20121455UNTB	1455	UNTB	L	C	R2	EDGE	3
2012	20121455UNTB	1455	UNTB	L	C	R3	EDGE	4.25
2012	20121455UNTB	1455	UNTB	L	C	R4	EDGE	3
2012	20121455UNTB	1455	UNTB	L	C	R5	EDGE	6.25
2012	20121455UNTC	1455	UNTC	L	C	R1	EDGE	0.5
2012	20121455UNTC	1455	UNTC	L	C	R2	EDGE	8.75
2012	20121455UNTC	1455	UNTC	L	C	R3	EDGE	4.75
2012	20121455UNTC	1455	UNTC	L	C	R4	EDGE	10
2012	20121455UNTC	1455	UNTC	L	C	R5	EDGE	4.25
2012	20121455UNTD	1455	UNTD	L	C	R1	EDGE	3.5
2012	20121455UNTD	1455	UNTD	L	C	R2	EDGE	7.5
2012	20121455UNTD	1455	UNTD	L	C	R3	EDGE	15.25
2012	20121455UNTD	1455	UNTD	L	C	R4	EDGE	9.25
2012	20121455UNTD	1455	UNTD	L	C	R5	EDGE	8.25
2012	20121455UNTE	1455	UNTE	L	C	R1	EDGE	1.25
2012	20121455UNTE	1455	UNTE	L	C	R2	EDGE	8.25
2012	20121455UNTE	1455	UNTE	L	C	R3	EDGE	14
2012	20121455UNTE	1455	UNTE	L	C	R4	EDGE	8
2012	20121455UNTE	1455	UNTE	L	C	R5	EDGE	9
2012	20121455UNTF	1455	UNTF	L	C	R1	EDGE	1.75
2012	20121455UNTF	1455	UNTF	L	C	R2	EDGE	4.75
2012	20121455UNTF	1455	UNTF	L	C	R3	EDGE	5.5
2012	20121455UNTF	1455	UNTF	L	C	R4	EDGE	5.25
2012	20121455UNTF	1455	UNTF	L	C	R5	EDGE	10
2012	20121495MCT1	1495	MCT1	L	C	R1	CAN	1.944444444
2012	20121495MCT1	1495	MCT1	L	C	R2	CAN	2.166666667
2012	20121495MCT1	1495	MCT1	L	C	R3	CAN	2.5
2012	20121495MCT1	1495	MCT1	L	C	R4	CAN	3.333333333
2012	20121495MCT1	1495	MCT1	L	C	R5	CAN	4.166666667
2012	20121495MCT2	1495	MCT2	L	C	R1	CAN	1.083333333
2012	20121495MCT2	1495	MCT2	L	C	R2	CAN	3.166666667
2012	20121495MCT2	1495	MCT2	L	C	R3	CAN	2.166666667
2012	20121495MCT2	1495	MCT2	L	C	R4	CAN	8.583333333
2012	20121495MCT2	1495	MCT2	L	C	R5	CAN	2.666666667
2012	20121495UNT1	1495	UNT1	L	C	R1	INT	1.25
2012	20121495UNT1	1495	UNT1	L	C	R2	INT	3.25
2012	20121495UNT1	1495	UNT1	L	C	R3	INT	10
2012	20121495UNT1	1495	UNT1	L	C	R4	INT	6.25
2012	20121495UNT1	1495	UNT1	L	C	R5	INT	9.25
2012	20121495UNT2	1495	UNT2	L	C	R1	INT	1
2012	20121495UNT2	1495	UNT2	L	C	R2	INT	1.25
2012	20121495UNT2	1495	UNT2	L	C	R3	INT	3.75
2012	20121495UNT2	1495	UNT2	L	C	R4	INT	1.25
2012	20121495UNT2	1495	UNT2	L	C	R5	INT	4.5
2012	20121495UNT3	1495	UNT3	L	C	R1	INT	2.75
2012	20121495UNT3	1495	UNT3	L	C	R2	INT	1.5
2012	20121495UNT3	1495	UNT3	L	C	R3	INT	5.75
2012	20121495UNT3	1495	UNT3	L	C	R4	INT	8
2012	20121495UNT3	1495	UNT3	L	C	R5	INT	18.75
2012	20121495UNT4	1495	UNT4	L	C	R1	INT	7.75
2012	20121495UNT4	1495	UNT4	L	C	R2	INT	9.75
2012	20121495UNT4	1495	UNT4	L	C	R3	INT	6.75
2012	20121495UNT4	1495	UNT4	L	C	R4	INT	4
2012	20121495UNT4	1495	UNT4	L	C	R5	INT	19
2012	20121495UNT5	1495	UNT5	L	C	R1	INT	7.75
2012	20121495UNT5	1495	UNT5	L	C	R2	INT	5
2012	20121495UNT5	1495	UNT5	L	C	R3	INT	13.5
2012	20121495UNT5	1495	UNT5	L	C	R4	INT	5.5
2012	20121495UNT5	1495	UNT5	L	C	R5	INT	13.5
2012	20121495UNT6	1495	UNT6	L	C	R1	INT	1.5
2012	20121495UNT6	1495	UNT6	L	C	R2	INT	0.5
2012	20121495UNT6	1495	UNT6	L	C	R3	INT	1.5
2012	20121495UNT6	1495	UNT6	L	C	R4	INT	3
2012	20121495UNT6	1495	UNT6	L	C	R5	INT	4
2012	20121495UNTA	1495	UNTA	L	C	R1	EDGE	0.5
2012	20121495UNTA	1495	UNTA	L	C	R2	EDGE	2.75
2012	20121495UNTA	1495	UNTA	L	C	R3	EDGE	3.5
2012	20121495UNTA	1495	UNTA	L	C	R4	EDGE	3.25
2012	20121495UNTA	1495	UNTA	L	C	R5	EDGE	8.5
2012	20121495UNTB	1495	UNTB	L	C	R1	EDGE	0.25
2012	20121495UNTB	1495	UNTB	L	C	R2	EDGE	3
2012	20121495UNTB	1495	UNTB	L	C	R3	EDGE	3
2012	20121495UNTB	1495	UNTB	L	C	R4	EDGE	1
2012	20121495UNTB	1495	UNTB	L	C	R5	EDGE	2
2012	20121495UNTC	1495	UNTC	L	C	R1	EDGE	0.5
2012	20121495UNTC	1495	UNTC	L	C	R2	EDGE	3
2012	20121495UNTC	1495	UNTC	L	C	R3	EDGE	9
2012	20121495UNTC	1495	UNTC	L	C	R4	EDGE	9.75
2012	20121495UNTC	1495	UNTC	L	C	R5	EDGE	9.25
2012	20121495UNTD	1495	UNTD	L	C	R1	EDGE	0.25
2012	20121495UNTD	1495	UNTD	L	C	R2	EDGE	2
2012	20121495UNTD	1495	UNTD	L	C	R3	EDGE	12.75
2012	20121495UNTD	1495	UNTD	L	C	R4	EDGE	10
2012	20121495UNTD	1495	UNTD	L	C	R5	EDGE	6.5
2012	20121495UNTE	1495	UNTE	L	C	R1	EDGE	0.25
2012	20121495UNTE	1495	UNTE	L	C	R2	EDGE	0.25
2012	20121495UNTE	1495	UNTE	L	C	R3	EDGE	0.75
2012	20121495UNTE	1495	UNTE	L	C	R4	EDGE	4.5
2012	20121495UNTE	1495	UNTE	L	C	R5	EDGE	2.25
2012	20121495UNTF	1495	UNTF	L	C	R1	EDGE	0.5
2012	20121495UNTF	1495	UNTF	L	C	R2	EDGE	0.5
2012	20121495UNTF	1495	UNTF	L	C	R3	EDGE	1
2012	20121495UNTF	1495	UNTF	L	C	R4	EDGE	2.5
2012	20121495UNTF	1495	UNTF	L	C	R5	EDGE	4.75
2012	20121548MCT1	1548	MCT1	L	I	R1	CAN	1.75
2012	20121548MCT1	1548	MCT1	L	I	R2	CAN	5
2012	20121548MCT1	1548	MCT1	L	I	R3	CAN	3.666666667
2012	20121548MCT1	1548	MCT1	L	I	R4	CAN	3.333333333
2012	20121548MCT1	1548	MCT1	L	I	R5	CAN	3.666666667
2012	20121548MCT2	1548	MCT2	L	I	R1	CAN	3
2012	20121548MCT2	1548	MCT2	L	I	R2	CAN	3.666666667
2012	20121548MCT2	1548	MCT2	L	I	R3	CAN	2.166666667
2012	20121548MCT2	1548	MCT2	L	I	R4	CAN	5.916666667
2012	20121548MCT2	1548	MCT2	L	I	R5	CAN	9.25
2012	20121548UNT1	1548	UNT1	L	I	R1	INT	1.25
2012	20121548UNT1	1548	UNT1	L	I	R2	INT	5
2012	20121548UNT1	1548	UNT1	L	I	R3	INT	15.5
2012	20121548UNT1	1548	UNT1	L	I	R4	INT	1
2012	20121548UNT1	1548	UNT1	L	I	R5	INT	14.75
2012	20121548UNT2	1548	UNT2	L	I	R1	INT	0.75
2012	20121548UNT2	1548	UNT2	L	I	R2	INT	3.75
2012	20121548UNT2	1548	UNT2	L	I	R3	INT	21.25
2012	20121548UNT2	1548	UNT2	L	I	R4	INT	4.5
2012	20121548UNT2	1548	UNT2	L	I	R5	INT	7.5
2012	20121548UNT3	1548	UNT3	L	I	R1	INT	9
2012	20121548UNT3	1548	UNT3	L	I	R2	INT	7
2012	20121548UNT3	1548	UNT3	L	I	R3	INT	16.25
2012	20121548UNT3	1548	UNT3	L	I	R4	INT	6.25
2012	20121548UNT3	1548	UNT3	L	I	R5	INT	14.25
2012	20121548UNT4	1548	UNT4	L	I	R1	INT	6
2012	20121548UNT4	1548	UNT4	L	I	R2	INT	3.5
2012	20121548UNT4	1548	UNT4	L	I	R3	INT	2.5
2012	20121548UNT4	1548	UNT4	L	I	R4	INT	3.25
2012	20121548UNT4	1548	UNT4	L	I	R5	INT	15.25
2012	20121548UNT5	1548	UNT5	L	I	R1	INT	2.25
2012	20121548UNT5	1548	UNT5	L	I	R2	INT	6.25
2012	20121548UNT5	1548	UNT5	L	I	R3	INT	4.5
2012	20121548UNT5	1548	UNT5	L	I	R4	INT	10
2012	20121548UNT5	1548	UNT5	L	I	R5	INT	15
2012	20121548UNT6	1548	UNT6	L	I	R1	INT	2
2012	20121548UNT6	1548	UNT6	L	I	R2	INT	3.25
2012	20121548UNT6	1548	UNT6	L	I	R3	INT	2.25
2012	20121548UNT6	1548	UNT6	L	I	R4	INT	9
2012	20121548UNT6	1548	UNT6	L	I	R5	INT	3.75
2012	20121548UNTA	1548	UNTA	L	I	R1	EDGE	2
2012	20121548UNTA	1548	UNTA	L	I	R2	EDGE	6.75
2012	20121548UNTA	1548	UNTA	L	I	R3	EDGE	0.75
2012	20121548UNTA	1548	UNTA	L	I	R4	EDGE	8.25
2012	20121548UNTA	1548	UNTA	L	I	R5	EDGE	12.25
2012	20121548UNTB	1548	UNTB	L	I	R1	EDGE	5.5
2012	20121548UNTB	1548	UNTB	L	I	R2	EDGE	3.25
2012	20121548UNTB	1548	UNTB	L	I	R3	EDGE	5.5
2012	20121548UNTB	1548	UNTB	L	I	R4	EDGE	16.25
2012	20121548UNTB	1548	UNTB	L	I	R5	EDGE	8
2012	20121548UNTC	1548	UNTC	L	I	R1	EDGE	14.25
2012	20121548UNTC	1548	UNTC	L	I	R2	EDGE	22
2012	20121548UNTC	1548	UNTC	L	I	R3	EDGE	11.5
2012	20121548UNTC	1548	UNTC	L	I	R4	EDGE	8
2012	20121548UNTC	1548	UNTC	L	I	R5	EDGE	11
2012	20121548UNTD	1548	UNTD	L	I	R1	EDGE	1.5
2012	20121548UNTD	1548	UNTD	L	I	R2	EDGE	26
2012	20121548UNTD	1548	UNTD	L	I	R3	EDGE	0.75
2012	20121548UNTD	1548	UNTD	L	I	R4	EDGE	6
2012	20121548UNTD	1548	UNTD	L	I	R5	EDGE	10.5
2012	20121548UNTE	1548	UNTE	L	I	R1	EDGE	5.5
2012	20121548UNTE	1548	UNTE	L	I	R2	EDGE	7.5
2012	20121548UNTE	1548	UNTE	L	I	R3	EDGE	11.25
2012	20121548UNTE	1548	UNTE	L	I	R4	EDGE	12.5
2012	20121548UNTE	1548	UNTE	L	I	R5	EDGE	9.25
2012	20121548UNTF	1548	UNTF	L	I	R1	EDGE	5
2012	20121548UNTF	1548	UNTF	L	I	R2	EDGE	3
2012	20121548UNTF	1548	UNTF	L	I	R3	EDGE	4.25
2012	20121548UNTF	1548	UNTF	L	I	R4	EDGE	4.75
2012	20121548UNTF	1548	UNTF	L	I	R5	EDGE	8.75
2012	20121687MCT1	1687	MCT1	S	I	R1	CAN	1.75
2012	20121687MCT1	1687	MCT1	S	I	R2	CAN	7.833333333
2012	20121687MCT1	1687	MCT1	S	I	R3	CAN	2.416666667
2012	20121687MCT1	1687	MCT1	S	I	R4	CAN	0.916666667
2012	20121687MCT1	1687	MCT1	S	I	R5	CAN	4.5
2012	20121687MCT2	1687	MCT2	S	I	R1	CAN	7.833333333
2012	20121687MCT2	1687	MCT2	S	I	R2	CAN	4.5
2012	20121687MCT2	1687	MCT2	S	I	R3	CAN	6.75
2012	20121687MCT2	1687	MCT2	S	I	R4	CAN	5.583333333
2012	20121687MCT2	1687	MCT2	S	I	R5	CAN	13.08333333
2012	20121687UNT1	1687	UNT1	S	I	R1	INT	2.75
2012	20121687UNT1	1687	UNT1	S	I	R2	INT	3.5
2012	20121687UNT1	1687	UNT1	S	I	R3	INT	3.75
2012	20121687UNT1	1687	UNT1	S	I	R4	INT	3.25
2012	20121687UNT1	1687	UNT1	S	I	R5	INT	16.75
2012	20121687UNT2	1687	UNT2	S	I	R1	INT	2.5
2012	20121687UNT2	1687	UNT2	S	I	R2	INT	8
2012	20121687UNT2	1687	UNT2	S	I	R3	INT	9.75
2012	20121687UNT2	1687	UNT2	S	I	R4	INT	6.75
2012	20121687UNT2	1687	UNT2	S	I	R5	INT	4.5
2012	20121687UNT3	1687	UNT3	S	I	R1	INT	4.25
2012	20121687UNT3	1687	UNT3	S	I	R2	INT	4.25
2012	20121687UNT3	1687	UNT3	S	I	R3	INT	3.75
2012	20121687UNT3	1687	UNT3	S	I	R4	INT	7
2012	20121687UNT3	1687	UNT3	S	I	R5	INT	9.75
2012	20121687UNT4	1687	UNT4	S	I	R1	INT	7
2012	20121687UNT4	1687	UNT4	S	I	R2	INT	14.5
2012	20121687UNT4	1687	UNT4	S	I	R3	INT	20.75
2012	20121687UNT4	1687	UNT4	S	I	R4	INT	6.75
2012	20121687UNT4	1687	UNT4	S	I	R5	INT	5.75
2012	20121687UNT5	1687	UNT5	S	I	R1	INT	3.75
2012	20121687UNT5	1687	UNT5	S	I	R2	INT	9
2012	20121687UNT5	1687	UNT5	S	I	R3	INT	18
2012	20121687UNT5	1687	UNT5	S	I	R4	INT	8
2012	20121687UNT5	1687	UNT5	S	I	R5	INT	17.25
2012	20121687UNT6	1687	UNT6	S	I	R1	INT	12.5
2012	20121687UNT6	1687	UNT6	S	I	R2	INT	10
2012	20121687UNT6	1687	UNT6	S	I	R3	INT	20.5
[truncated: 802 more rows]
